# A viral perspective on worldwide non-pharmaceutical interventions against COVID-19

Jean-Philippe Rasigade<sup>1,2\*</sup>, Anaïs Barray<sup>1</sup>, Julie Teresa Shapiro<sup>1</sup>, Charlène Coquisart<sup>3,4</sup>, Yoann Vigouroux<sup>3,4</sup>, Antonin Bal<sup>1,2,5</sup>, Grégory Destras<sup>1,2,5</sup>, Philippe Vanhems<sup>1,6</sup>, Bruno Lina<sup>1,2,5</sup>, Laurence Josset<sup>1,2,5</sup>, Thierry Wirth<sup>3,4\*</sup>.

<sup>1</sup>CIRI, Centre International de Recherche en Infectiologie, Université de Lyon, Inserm U1111, Université Claude Bernard Lyon 1, CNRS UMR5308, Ecole Normale Supérieure de Lyon, Lyon 69007, France.

<sup>2</sup>Institut des Agents Infectieux, Hospices Civils de Lyon, Lyon 69004, France.

<sup>3</sup>Institut de Systématique, Evolution, Biodiversité (ISYEB), Muséum national d'Histoire naturelle, CNRS, Sorbonne Université, Université des Antilles, EPHE, Paris 75005, France.

<sup>4</sup>PSL University, EPHE, Paris 75014, France.

<sup>5</sup>Centre National de Référence des Virus Respiratoires, Hospices Civils de Lyon, Lyon 69004, France.

<sup>6</sup>Service d'Hygiène, Epidémiologie, Infectiovigilance et Prévention, Hospices Civils de Lyon (HCL), Lyon 69008, France.

\*Corresponding author: [jean-philippe.rasigade@univ-lyon1.fr](mailto:jean-philippe.rasigade@univ-lyon1.fr); alternate corresponding author: [wirth@mnhn.fr](mailto:wirth@mnhn.fr)

22        **Abstract:**

23        Quantifying the effectiveness of large-scale non-pharmaceutical interventions (NPIs)  
24        against COVID-19 is critical to adapting responses against future waves of the  
25        pandemic. Most studies of NPIs thus far have relied on epidemiological data. Here, we  
26        report the impact of NPIs on the evolution of SARS-CoV-2, taking the perspective of the  
27        virus. We examined how variations through time and space of SARS-CoV-2 genomic  
28        divergence rates, which reflect variations of the epidemic reproduction number  $R_t$ , can  
29        be explained by NPIs and combinations thereof. Based on the analysis of 5,198 SARS-  
30        CoV-2 genomes from 57 countries along with a detailed chronology of 9 non-  
31        pharmaceutical interventions during the early epidemic phase up to May 2020, we find  
32        that home containment (35%  $R_t$  reduction) and education lockdown (26%) had the  
33        strongest predicted effectiveness. To estimate the cumulative effect of NPIs, we  
34        modelled the probability of reducing  $R_t$  below 1, which is required to stop the epidemic,  
35        for various intervention combinations and initial  $R_t$  values. In these models, no  
36        intervention implemented alone was sufficient to stop the epidemic for  $R_t$ 's above 2 and  
37        all interventions combined were required for  $R_t$ 's above 3. Our approach can help  
38        inform decisions on the minimal set of NPIs required to control the epidemic depending  
39        on the current  $R_t$  value.

40 Coronavirus disease 2019 (COVID-19), caused by the severe acute respiratory  
41 syndrome coronavirus 2 (SARS-CoV-2), emerged in China in late 2019<sup>1-3</sup>. Facing or  
42 anticipating the pandemic, the governments of most countries implemented a wide  
43 range of large-scale non-pharmaceutical interventions, such as lockdown measures, in  
44 order to reduce COVID-19 transmission<sup>4-6</sup>. Concerns have been raised regarding the  
45 impact of such interventions on the economy, education, and, indirectly, the healthcare  
46 system<sup>7</sup>.

47 Understanding the effectiveness of each non-pharmaceutical intervention against  
48 COVID-19 is critical to implementing appropriate responses against current or future  
49 waves of the pandemic. Comparative studies of interventions typically rely on  
50 epidemiological data to estimate variations of the epidemic reproduction number, which  
51 are then correlated with the implementation or relaxation of interventions<sup>5,6,8</sup>. These  
52 studies yielded conflicting conclusions. Depending on data sources and epidemiological  
53 model design assumptions, some studies identified lockdown (stay at home order) as  
54 the most effective intervention<sup>5,9</sup> while others found little additional impact, if any,  
55 compared to other interventions<sup>4,6,10</sup>. Epidemiological studies of interventions against an  
56 epidemic face several challenges. Models informed by counts of confirmed cases or  
57 deaths ignore the relationships and transmission patterns between cases. Counts  
58 themselves can vary in accuracy and timeliness depending on countries' health  
59 facilities, surveillance systems, and the changing definitions of cases. Even when an  
60 intervention immediately reduces the transmission rate, a detectable reduction of  
61 disease incidence can be much delayed<sup>6</sup>, especially when testing and diagnoses are  
62 restricted to specific patient populations. This delay from intervention to incidence  
63 reduction, combined with the variety and simultaneous implementation of  
64 interventions<sup>4,5</sup>, complicates the identification of their individual effects.

65 Unlike epidemiological case counts, viral genomes bear phylogenetic information  
66 relevant to disease transmission. Extracting this information is the goal of  
67 phylodynamics, which relies on evolutionary theory and bioinformatics to model the  
68 dynamics of an epidemic<sup>11</sup>. The dates of viral transmission events can also be inferred  
69 from genome sequences to alleviate, at least in part, the problems of delayed detection

70 of an intervention's effect. Here, we conducted a phylodynamic analysis of 5,198 SARS-  
71 CoV-2 genomes from 57 countries to estimate the independent effects of 9 large-scale  
72 non-pharmaceutical interventions on the transmission rate of COVID-19 during the early  
73 dissemination phase of the pandemic. We adapted an established phylogenetic  
74 method<sup>12,13</sup> to model variations of the divergence rate of SARS-CoV-2 in response to  
75 interventions and combinations thereof. Building on known relationships between the  
76 viral divergence rate and the effective reproduction number  $R_t$ <sup>14</sup>, we quantified the  
77 reduction of  $R_t$  independently attributable to each intervention, exploiting  
78 heterogeneities in their nature and timing across countries in multivariable models. In  
79 turn, these results enabled estimating the probability of stopping the epidemic ( $R_t < 1$ )  
80 when implementing selected combinations of interventions.  
81

82

83

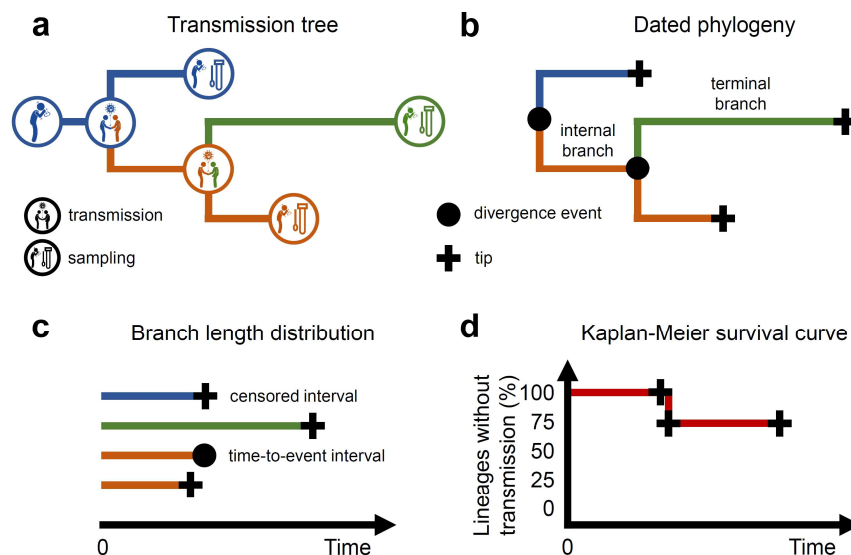

84

85

86

87

88

89

90

91

92

93

94

95

96

97

98

99

**Fig. 1. Conceptual overview of phylodynamic survival analysis.** Under the assumption that each viral lineage in a phylogeny belongs to an infected patient, the dates of viral transmission and sampling events in a transmission tree (a) coincide with the dates of divergence events (nodes) and tips, respectively, of the dated phylogeny reconstructed from the viral genomes (b). Treating viral transmission as the event of interest for survival modelling, internal branches connecting two divergence events are interpreted as time-to-event intervals while terminal branches, that do not end with a transmission event, are interpreted as censored intervals (c). Translating the dated phylogeny in terms of survival events enables visualizing the probability of transmission through time as a Kaplan-Meier curve (d) and modelling the transmission rate using Cox proportional hazards regression.

## 100 **Survival modelling of viral transmission**

101 The dissemination and detection of a virus in a population can be described as a  
102 transmission tree (Fig. 1a) whose shape reflects that of the dated phylogeny of the  
103 sampled pathogens (Fig. 1b). In a phylodynamic context, it is assumed that each  
104 lineage, represented by a branch in the phylogenetic tree, belongs to a single patient  
105 and that lineage divergence events, represented by tree nodes, coincide with  
106 transmission events<sup>11</sup>. Thus, branches in a dated phylogeny represent intervals of time  
107 between divergence events interpreted as transmission events. This situation can be  
108 translated in terms of survival analysis, which models rates of event occurrence, by  
109 considering divergence as the event of interest and by treating branch lengths as time-  
110 to-event intervals (Fig. 1c, d). Phylogenetic survival analysis was devised by E. Paradis  
111 and applied to detecting temporal variations in the divergence rate of tanagers<sup>12</sup> or  
112 fishes<sup>15</sup>, but it has not been applied to pathogens so far<sup>13,16,17</sup>.

113 To quantify the effect of non-pharmaceutical interventions on the transmission  
114 rate of COVID-19, we adapted the original model in the Paradis study<sup>12</sup> to account for  
115 the specific setting of viral phylodynamics (see Methods). Hereafter, we refer to the  
116 modified model as phylodynamic survival analysis. In survival analysis terms, we  
117 interpret internal branches of the phylogeny (those that end with a transmission event)  
118 as time-to-event intervals and terminal branches (those that end with a sampling event)  
119 as censored intervals (Fig. 1c; see Methods).

120 The predictors of interest in our setting, namely, the non-pharmaceutical  
121 interventions, vary both through time and across lineages depending on their  
122 geographic location. To model this, we assigned each divergence event (and  
123 subsequent branch) to a country using maximum-likelihood ancestral state  
124 reconstruction. Each assigned branch was then associated with the set of non-  
125 pharmaceutical interventions that were active or not in the country during the interval  
126 spanned by the branch. Intervals containing a change of intervention were split into  
127 subintervals<sup>18</sup>. These (sub)intervals were the final observations (statistical units) used in

128 the survival models. Models were adjusted for the hierarchical dependency structure  
129 introduced by interval splits and country assignments (see Methods).

### 130 **Phylogenetic survival models estimate variations of the reproduction number**

131 The evolution of lineages in a dated viral phylogeny can be described as a birth-death  
132 process with a divergence (or birth) rate  $\lambda$  and an extinction (or death) rate  $\mu$ <sup>19</sup>. In a  
133 phylodynamic context, the effective reproduction number  $R_t$  equals the ratio of the  
134 divergence and extinction rates<sup>19</sup>. Coefficients of phylodynamic survival models (the so-  
135 called hazard ratios of divergence; see Methods) act as multiplicative factors of the  
136 divergence rate  $\lambda$ , independent of the true value of  $\lambda$  which needs not be specified nor  
137 evaluated. As  $R_t = \lambda/\mu$ , multiplying  $\lambda$  by a coefficient also multiplies  $R_t$ , independent of  
138 the true value of  $\mu$ . Thus, coefficients of phylodynamic survival models estimate  
139 variations of  $R_t$  in response to predictor variables without requiring external knowledge  
140 or assumptions about  $\lambda$  and  $\mu$ .

141

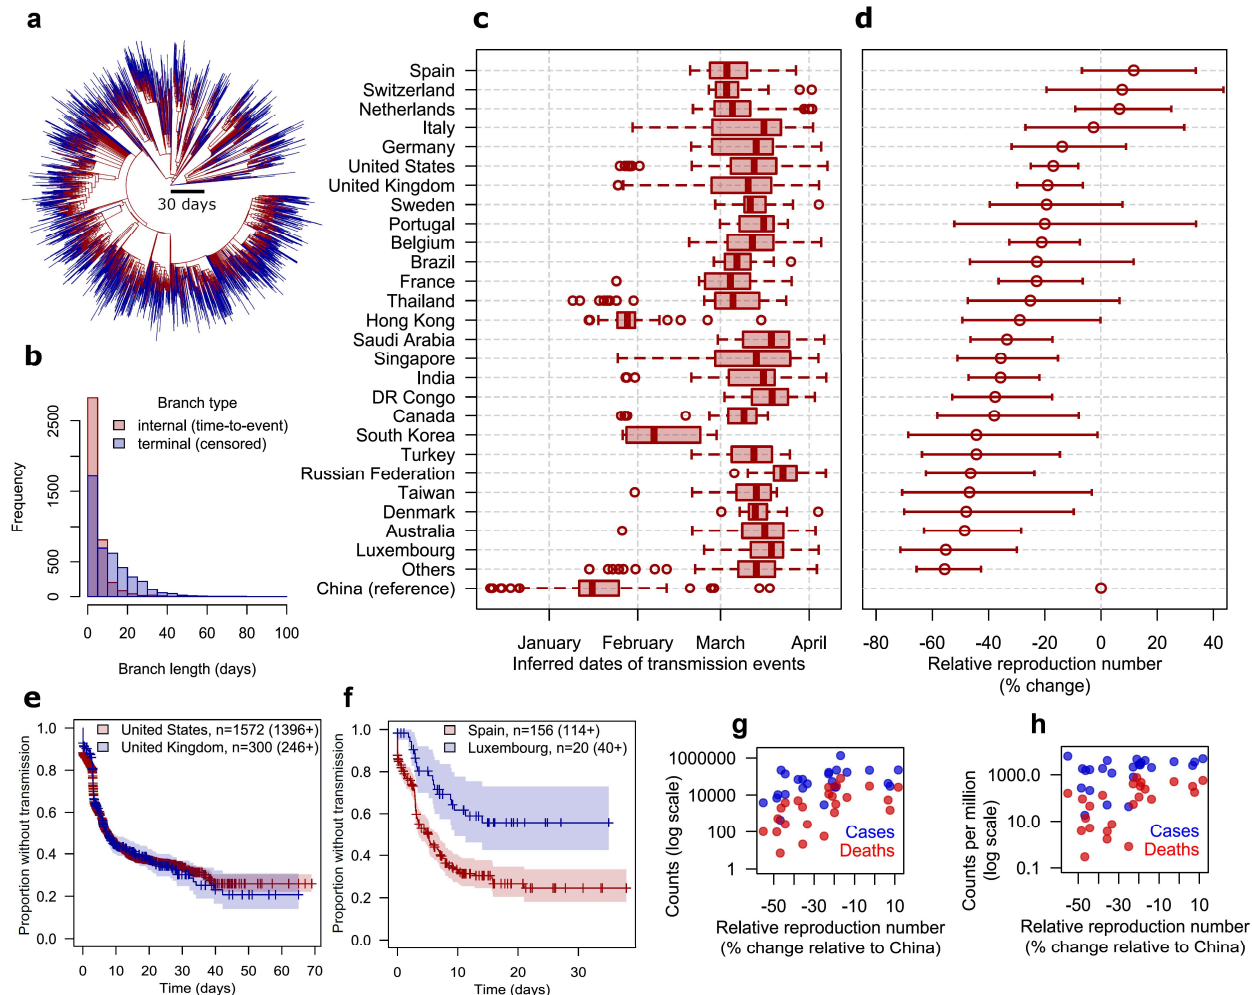

142

143

144

145

146

147

148

149

150

151

152

153

154

155

156

157

158

159

**Figure 2. Timing and reproduction numbers of the COVID-19 epidemic in 74 countries based on a dated phylogeny.** **a**, Dated phylogeny of 5,198 SARS-CoV-2 genomes where internal (time-to-event) and terminal (time-to-censoring) branches are colored red and blue, respectively. **b**, Histogram of internal and terminal branch lengths. **c**, Box-and-whisker plots of the distribution over time of the inferred transmission events in each country, where boxes denote interquartile range (IQR) and median, whiskers extend to dates at most 1.5x the IQR away from the median date, and circle marks denote dates farther than 1.5 IQR from the median date. **d**, Point estimates and 95% confidence intervals of the relative effective reproduction number, expressed as percent changes relative to China, in 27 countries with  $\geq 10$  assigned transmission events. Countries with  $< 10$  assigned transmission events ( $n=32$ ) were pooled into the ‘Others’ category. **e**, **f**, Representative Kaplan-Meier survival curves of the probability of transmission through time in countries with comparable (**e**) or contrasting (**f**) transmission rates. ‘+’ marks denote censoring events. Numbers denote counts of internal branches and, in brackets, terminal branches. **g**, **h**, Scatter plots showing correlations between the relative reproduction number and the reported cumulative numbers of COVID-19 cases (blue marks) and deaths (red marks) per country up to May 12, 2020 (53), in absolute values (**g**) and per million inhabitants (**h**).



## 160 **Variations in COVID-19 transmission rates across countries**

161 We assembled a composite dataset by combining a dated phylogeny of SARS-CoV-2  
162 (Fig. 2a), publicly available from Nextstrain<sup>20</sup> and built from the GISAID initiative data<sup>21</sup>,  
163 with a detailed timeline of non-pharmaceutical interventions available from the Oxford  
164 COVID-19 Government Response Tracker (OxCGRT)<sup>22</sup>. Extended Data Fig. 1 shows a  
165 flowchart outlining the data sources, sample sizes and selection steps of the study.  
166 Phylogenetic and intervention data covered the early phase of the epidemic up to May  
167 4, 2020.

168 The 5,198 SARS-CoV-2 genomes used to reconstruct the dated phylogeny were  
169 collected from 74 countries. Detailed per-country data including sample sizes are shown  
170 in Extended Data Table 1. Among the 10,394 branches in the phylogeny, 2,162  
171 branches (20.8%) could not be assigned to a country with >95% confidence and were  
172 excluded, also reducing the number of represented countries from 74 to 59 (Extended  
173 Data Fig. 1; a comparison of included and excluded branches is shown in Extended  
174 Data Fig. 2). The remaining 4,025 internal branches had a mean time-to-event (delay  
175 between transmission events) of 4.4 days (Fig. 2b). These data were congruent with  
176 previous estimates of the mean serial interval of COVID-19 ranging from 3.1 days to 7.5  
177 days<sup>23</sup>. The 4,207 terminal branches had a mean time-to-censoring (delay from infection  
178 to detection) of 10.6 days (Fig. 2a, b). This pattern of longer terminal vs. internal  
179 branches is typical of a viral population in fast expansion<sup>11</sup>.

180 We compared the timing and dynamics of COVID-19 spread in countries  
181 represented in our dataset (Fig. 2c, d), pooling countries with <10 assigned  
182 transmission events into an 'others' category. The estimated date of the first local  
183 transmission event in each country showed good concordance with the reported dates  
184 of the epidemic onset (Pearson correlation = 0.84; Extended Data Fig. 3). The relative  
185 effective reproduction number  $R_t$  per country, taking China as reference, ranged from -  
186 55.6% (95%CI, -71.4% to -29.9%) in Luxembourg to +11.7% (95% CI, -6.7% to +33.8%)  
187 in Spain (Fig. 2c). Notice that these estimates are averages over variations of  $R_t$   
188 through time in each country, up to May 4, 2020. Exemplary survival curves of

189 transmission events are shown in Fig. 2e, f. Relative  $R_t$ 's are not expected to  
190 necessarily correlate with the reported counts of COVID-19 cases across all countries  
191 due to the confounding effects of population sizes, case detection policies and the  
192 number of genomes included. Nevertheless, the relative  $R_t$ 's across countries  
193 substantially correlated with the reported cumulative counts up to May 12 (Fig. 2g, h),  
194 including COVID-19 cases (Pearson correlation with log-transformed counts, 0.46, 95%  
195 CI, 0.07 to 0.73), deaths (correlation 0.59, 95% CI, 0.24 to 0.80), cases per million  
196 inhabitants (correlation 0.39, 95% CI, -0.01 to 0.69) and deaths per million inhabitants  
197 (correlation 0.56, 95% CI, 0.21 to 0.79).  
198

199

**Table 1. Selected large-scale non-pharmaceutical interventions against COVID-19.**

| <b>Non-pharmaceutical intervention</b> | <b>OxCGRT identifier</b> | <b>Definition</b>                                                                                                |
|----------------------------------------|--------------------------|------------------------------------------------------------------------------------------------------------------|
| Information campaign                   | H1                       | Coordinated public information campaign across traditional and social media                                      |
| Restrict international travel          | C8                       | Ban or quarantine arrivals from high-risk regions                                                                |
| Education lockdown                     | C1                       | Require closing for some or all education levels or categories, e.g., high schools, public schools, universities |
| Cancel public events                   | C3                       | Require cancelling of all public events                                                                          |
| Restrict gatherings >100 pers.         | C4                       | Prohibit gatherings over 100 persons                                                                             |
| Close workplaces                       | C2                       | Require closing or working from home for some or all non-essential sectors or categories of workers              |
| Restrict internal movements            | C7                       | Require closing routes or prohibit most citizens from using them                                                 |
| Close public transport                 | C5                       | Require closing of public transport or prohibit most citizens from using it                                      |
| Home containment                       | C6                       | Require not leaving house with or without exceptions for daily exercise, grocery shopping and essential trips    |

NOTE. OxCGRT, Oxford COVID-19 Government Response Tracker initiative, [www.bsg.ox.ac.uk/covidtracker](http://www.bsg.ox.ac.uk/covidtracker)

200

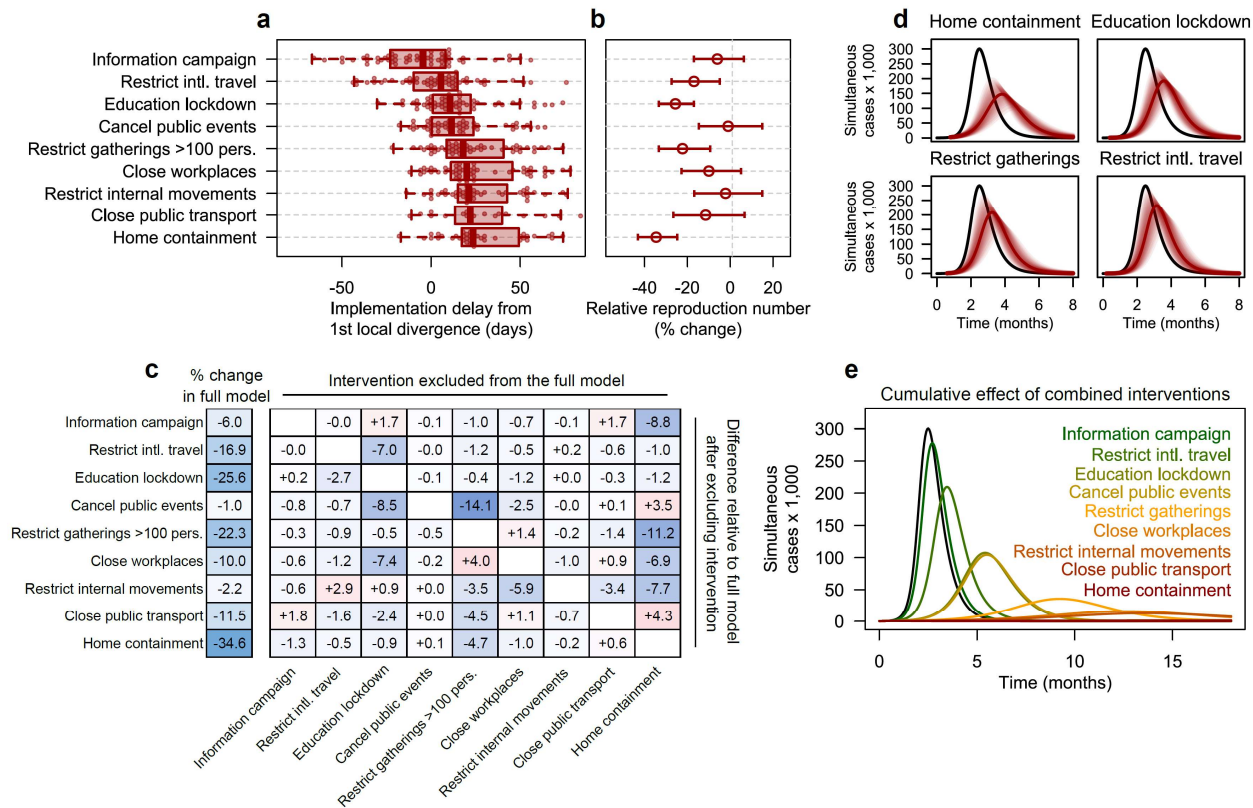

**Figure 3. Non-pharmaceutical interventions variably reduce the reproduction number of COVID-19.** Data derive from the phylogenetic survival analysis of 4,191 internal and 4,019 terminal branches of a dated phylogeny of SARS-CoV-2 genomes, combined with a chronology of interventions in 57 countries. **a**, Box-and-whisker plots of the delay between the 1st SARS-CoV-2 divergence event and the intervention. Plot interpretation is similar with Fig. 2c. **b**, Point estimates and 95% confidence intervals of the independent % change of the effective reproduction number predicted by each intervention in a multivariable, mixed-effect phylogenetic survival model adjusted for between-country variations. **c**, Matrix of pairwise interactions between the interventions (in rows) estimated using 9 multivariable models (in columns), where each model ignores exactly one intervention. Negative (positive) differences in blue (red) denote a stronger (lesser) predicted effect of the intervention in row when ignoring the intervention in column. **d**, **e**, Simulated impact of interventions implemented independently (**d**) or in sequential combination (**e**) on the count of simultaneous cases in an idealized population of 1 million susceptible individuals using compartmental SIR models with a basic reproduction number  $R_0 = 3$  (black lines) and a mean infectious period of 2 weeks. Shaded areas in (**d**) denote 95% confidence bands.

201

202

203

204

205

206

207

208

209

210

211

212

213

214

215

216

217

## 218 **Disentangling the individual effectiveness of non-pharmaceutical interventions**

219 The implementation and release dates of large-scale non-pharmaceutical interventions  
220 against COVID-19 were available for 57 countries out of the 59 represented in the dated  
221 phylogeny. Definitions of the selected interventions are shown in Table 1. Branches  
222 assigned to countries with missing intervention data, namely, Latvia and Senegal, were  
223 excluded from further analysis ( $n=22/8,262$  (0.3%); see Extended Data Fig. 1). Up to  
224 May 4, 2020, the interventions most universally implemented were information  
225 campaigns, restrictions on international travel and education lockdown (>95% of  
226 countries) (Extended Data Fig. 4). The least frequent were the closure of public  
227 transportation (35%) and home containment (72%). Public information campaigns came  
228 first and home containment came last (median delay across countries, 5 days before  
229 and 24 days after the first local transmission event, respectively; Fig. 3a). Survival  
230 curves for each intervention are shown in Extended Data Fig. 5. Most interventions  
231 were implemented in combination and accumulated over time rather than replacing  
232 each other (Extended Data Fig. 4; median delays between interventions are shown in  
233 Extended Data Fig. 6; correlations in Extended Data Fig. 7; and a detailed timeline of  
234 interventions in Extended Data Table 2). However, we observed a substantial  
235 heterogeneity of intervention timing across the 57 countries (Fig. 3a), suggesting that  
236 individual intervention effects can be discriminated by multivariable analysis given the  
237 large sample size ( $n=8,210$  subintervals).

238 A multivariable phylogenetic survival model, including the 9 interventions and  
239 controlling for between-country  $R_t$  variations (see Methods), showed a strong fit to the  
240 data (likelihood-ratio test compared to the null model,  $P < 10^{-196}$ ). In this model, the  
241 interventions most strongly and independently associated with a reduction of the  
242 effective reproduction number  $R_t$  of SARS-CoV-2 were home containment ( $R_t$  percent  
243 change, -34.6%, 95%CI, -43.2 to -24.7%), education lockdown (-25.6%, 95%CI, -33.4 to  
244 -16.9%), restricting gatherings (-22.3%, 95%CI, -33.4 to -9.4%) and international travel  
245 (-16.9%, 95%CI, -27.5 to -4.8%). We failed to detect a substantial impact of other  
246 interventions, namely information campaigns, cancelling public events, closing

247 workplaces, restricting internal movement, and closing public transportation (Fig. 3b).  
248 Based on coefficient estimates, all interventions were independently predicted to reduce  
249  $R_t$  (even by a negligible amount), in line with the intuition that no intervention should  
250 accelerate the epidemic. Contrasting with previous approaches that constrained  
251 coefficients<sup>5</sup>, this intuition was not enforced a priori in our multivariable model, in which  
252 positive coefficients (increasing  $R_t$ ) might have arisen due to noise or collinearity  
253 between interventions. The absence of unexpectedly positive coefficients suggests that  
254 our model correctly captured the epidemic slowdown that accompanied the  
255 accumulation of interventions.

### 256 **Estimated intervention effects are robust to time-dependent confounders and** 257 **collinearity**

258 A reduction of  $R_t$  through time, independent of the implementation of interventions,  
259 might lead to overestimate their effect in our model. Several potential confounders might  
260 reduce  $R_t$  through time but cannot be precisely estimated and included as control  
261 covariates. These included the progressive acquisition of herd immunity, the so-called  
262 artificial diversification slowdown possibly caused by incomplete sampling, and time-  
263 dependent variations of the sampling effort (see Methods). To quantify this potential  
264 time-dependent bias, we constructed an additional model including the age of each  
265 branch as a covariate (Extended Data Table 1). The coefficients in this time-adjusted  
266 model only differed by small amounts compared to the base model. Moreover, the  
267 ranking by effectiveness of the major interventions remained unchanged, indicating that  
268 our estimates were robust to time-dependent confounders.

269 We also quantified the sensitivity of the estimated intervention effects to the  
270 inclusion of other interventions (collinearity) by excluding interventions one by one in 9  
271 additional models (Fig. 3c). This pairwise interaction analysis confirmed that most of the  
272 estimated effects were strongly independent. Residual interferences were found for  
273 gathering restrictions, whose full-model effect of -22.3% was reinforced to -33.5% when  
274 ignoring home containment; and for cancelling public events, whose full-model effect of  
275 -0.97% was reinforced to -15.1% when ignoring gathering restrictions. These residual

276 interferences make epidemiological sense because home containment prevents  
 277 gatherings and gathering restrictions also prohibit public events. Overall, the absence of  
 278 strong interferences indicated that our multivariable model reasonably captured the  
 279 independent, cumulative effect of interventions, enabling ranking their impact on  
 280 COVID-19 spread.

**Table 2. Predicted reduction of the COVID-19 effective reproduction number under increasingly stringent combinations of non-pharmaceutical interventions.**

| Accumulated interventions        | Relative $R_t$<br>(cumulative % change) | Probability of reducing $R_t$ below 1 |           |           |           |           |
|----------------------------------|-----------------------------------------|---------------------------------------|-----------|-----------|-----------|-----------|
|                                  |                                         | $R_0=1.5$                             | $R_0=2.0$ | $R_0=2.5$ | $R_0=3.0$ | $R_0=3.5$ |
| Information campaign             | -6.0 (-17.0 to +6.5)                    | <0.01                                 | <0.01     | <0.01     | <0.01     | <0.01     |
| + Restrict intl. travel          | -21.9 (-35.0 to -6.1)                   | 0.05                                  | <0.01     | <0.01     | <0.01     | <0.01     |
| + Education lockdown             | -41.9 (-52.5 to -29.0)                  | 0.91                                  | 0.07      | <0.01     | <0.01     | <0.01     |
| + Cancel public events           | -42.5 (-54.0 to -28.1)                  | 0.90                                  | 0.11      | <0.01     | <0.01     | <0.01     |
| + Restrict gatherings >100 pers. | -55.3 (-63.4 to -45.5)                  | 1.00                                  | 0.86      | 0.14      | <0.01     | <0.01     |
| + Close workplaces               | -59.7 (-67.6 to -50.0)                  | 1.00                                  | 0.98      | 0.48      | 0.04      | <0.01     |
| + Restrict internal movements    | -60.6 (-67.9 to -51.6)                  | 1.00                                  | 0.99      | 0.56      | 0.06      | <0.01     |
| + Close public transport         | -65.1 (-72.6 to -55.7)                  | 1.00                                  | 1.00      | 0.87      | 0.36      | 0.05      |
| + Home containment               | -77.2 (-81.5 to -71.9)                  | 1.00                                  | 1.00      | 1.00      | 1.00      | 0.98      |

281  
 282

### 283 **Simulating intervention effectiveness in an idealized population**

284 To facilitate the interpretation of our estimates of the effectiveness of interventions  
 285 against COVID-19, we simulated each intervention's impact on the peak number of  
 286 cases, whose reduction is critical to prevent overwhelming the healthcare system (Fig.  
 287 3d and Extended Data Fig. 8). We used compartmental Susceptible-Infected-Recovered  
 288 (SIR) models with a basic reproduction number  $R_0 = 3$  and a mean infectious period of  
 289 2 weeks based on previous estimates<sup>24,25</sup>, in an idealized population of 1 million  
 290 susceptible individuals (see Methods). In each model, we simulated the implementation  
 291 of a single intervention at a date chosen to reflect the median delay across countries  
 292 (Fig. 3a) relative to the epidemic onset (see Methods). On implementation date, the



293 effective reproduction number was immediately reduced according to the estimated  
294 intervention's effect shown in Fig. 3b.

295 In this idealized setting, home containment, independent of all other restrictions,  
296 only halved the peak number of cases from  $3.0 \times 10^5$  to  $1.5 \times 10^5$  (95% CI,  $1.0 \times 10^5$  to  
297  $2.0 \times 10^5$ ) (Fig. 3d). However, a realistic implementation of home containment also  
298 implies other restrictions including, at least, restrictions on movements, gatherings, and  
299 public events. This combination resulted in a relative  $R_t$  of -50.8% (95% CI, -59.4% to -  
300 40.2%) and a 5-fold reduction of the peak number of cases to  $6.0 \times 10^4$  (95% CI,  $1.9 \times 10^4$   
301 to  $1.2 \times 10^5$ ). Nevertheless, if  $R_0 = 3$  then a 50% reduction is still insufficient to reduce  $R_t$   
302 below 1 and stop the epidemic. This suggests that even when considering the most  
303 stringent interventions, combinations may be required. To further examine this issue, we  
304 estimated the effect of accumulating interventions by their average chronological order  
305 shown in Fig. 3a, from information campaigns alone to all interventions combined  
306 including home containment (Fig. 3e). Strikingly, only the combination of all  
307 interventions completely stopped the epidemic under our assumed value of  $R_0$ . To  
308 estimate the effectiveness of combined interventions in other epidemic settings, we  
309 computed the probabilities of reducing  $R_t$  below 1 for values of  $R_0$  ranging from 1.5 to  
310 3.5 (Table 2; see Methods). The same probabilities for individual interventions are  
311 presented in Table S2, showing that no single intervention would stop the epidemic if  
312  $R_0 \geq 2$ . These results may help inform decisions on the appropriate stringency of the  
313 restrictions required to control the epidemic under varying transmission regimes.  
314



## 315 Discussion

316 We present a phylodynamic analysis of how the divergence rate and reproduction  
317 number of SARS-CoV-2 varies in response to large-scale non-pharmaceutical  
318 interventions in 57 countries. Our results suggest that no single intervention, including  
319 home containment, is sufficient on its own to stop the epidemic ( $R_t < 1$ ). Increasingly  
320 stringent combinations of interventions may be required depending on the effective  
321 reproduction number.

322 Home containment was repeatedly estimated to be the most effective response  
323 in epidemiological studies from China<sup>26</sup>, France<sup>27</sup>, the UK<sup>28</sup>, and Europe<sup>5</sup>. Other studies  
324 modelled the additional (or residual) reduction of  $R_t$  by an intervention after taking into  
325 account those previously implemented<sup>4,6,10</sup>. Possibly because home containment was  
326 the last implemented intervention in many countries (Fig. 2a), these studies reported a  
327 weaker or even negligible additional effect compared to earlier interventions. In our  
328 study, home containment, even when implemented last, had the strongest independent  
329 impact on epidemic spread ( $R_t$  percent change, -34.6%), which was further amplified (-  
330 50.8%) when taking into account implicit restrictions on movements, gatherings and  
331 public events.

332 We found that education lockdown substantially decreased COVID-19 spread ( $R_t$   
333 percent change, -25.6%). Contrasting with home containment, the effectiveness of  
334 education lockdown has been more hotly debated. This intervention ranked among the  
335 most effective ones in two international studies<sup>4,6</sup> but had virtually no effect on  
336 transmission in other reports from Europe<sup>5,10</sup>. Young children have been estimated to be  
337 poor spreaders of COVID-19 and less susceptible than adults to develop disease after  
338 an infectious contact, counteracting the effect of their higher contact rate<sup>29,30</sup>. However,  
339 the relative susceptibility to infection was shown to increase sharply between 15 and 25  
340 years, suggesting that older students might be more involved in epidemic spread<sup>30</sup>.  
341 Importantly, we could not differentiate the effect of closing schools and universities  
342 because both closures coincided in all countries. Thus, our finding that education  
343 lockdowns reduce COVID-19 transmission might be driven by contact rate reductions in

344 older students rather than in children, as hypothesized elsewhere<sup>4</sup>. This raises the  
345 question of whether education lockdown should be adapted to age groups, considering  
346 that: (1), education lockdown had a sizeable impact on COVID-19 transmission in our  
347 study and others<sup>4,6</sup>; (2), this impact might be preferentially driven by older students<sup>29,30</sup>;  
348 and (3) autonomous distance learning might be more effective in university students<sup>31</sup>  
349 compared to younger children who require parental presence and supervision following  
350 school closure, possibly widening the gap for children from under-resourced  
351 backgrounds<sup>32</sup>. Based on these elements, we speculate that closing universities, but not  
352 elementary schools, might strike the right balance between efficacy and social impact.

353 Restrictions on gatherings of >100 persons appeared more effective than  
354 cancelling public events ( $R_t$  percent changes, -22.3% vs. -1.0%, respectively) in our  
355 phylodynamic model, in line with previous results from epidemiological models<sup>4</sup>.  
356 Notwithstanding that gathering restrictions prohibit public events, possibly causing  
357 interferences between estimates (Fig. 3c), this finding is intriguing. Indeed, several  
358 public events resulted in large case clusters, the so-called superspreading events, that  
359 triggered epidemic bursts in France<sup>33</sup>, South Korea<sup>34</sup> or the U.S.<sup>35</sup>. A plausible  
360 explanation for not detecting the effectiveness of cancelling public events is that data-  
361 driven models, including ours, better capture the cumulative effect of more frequent  
362 events such as gatherings than the massive effect of much rarer events such as  
363 superspreading public events. This bias towards ignoring the so-called 'Black Swan'  
364 exceptional events<sup>36</sup> suggests that our findings (and others<sup>14</sup>) regarding restrictions on  
365 public events should not be interpreted as an encouragement to relax these restrictions  
366 but as a potential limit of modelling approaches (but see<sup>37</sup>).

367 There are other limitations to our study, including its retrospective design. Similar  
368 to previous work<sup>6</sup>, we did not consider targeted non-pharmaceutical interventions that  
369 are difficult to date and quantify, such as contact tracing or case isolation policies. Data  
370 were analyzed at the national level, although much virus transmission was often  
371 concentrated in specific areas and some non-pharmaceutical interventions were  
372 implemented at the sub-national level<sup>38</sup>. Our phylogeographic inferences did not  
373 consider the travel history of patients, whose inclusion in Bayesian models was recently

374 shown to alleviate sampling bias<sup>39</sup>. From a statistical standpoint, the interval lengths in  
375 the dated phylogeny were treated as fixed quantities in the survival models. Ignoring the  
376 uncertainty of the estimated lengths might underestimate the width of confidence  
377 intervals, although this is unlikely to have biased the pointwise estimates and the  
378 ranking of interventions' effects. The number of genomes included by country did not  
379 necessarily reflect the true number of cases, which might have influenced country  
380 comparison results in Fig. 2, but not intervention effectiveness models in Fig. 3 which  
381 were adjusted for between-country variations of  $R_t$ . Finally, our estimates represent  
382 averages over many countries with different epidemiological contexts, healthcare  
383 systems, cultural behaviors and nuances in intervention implementation details and  
384 population compliance. This global approach, similar to previous work<sup>4,6</sup>, facilitates  
385 unifying the interpretation of intervention effectiveness, but this interpretation still needs  
386 to be adjusted to local contexts by policy makers.

387 Beyond the insights gained into the impact of interventions against COVID-19,  
388 our findings highlight how phylodynamic survival analysis can help leverage pathogen  
389 sequence data to estimate epidemiological parameters. Contrasting with the Bayesian  
390 approaches adopted by most, if not all, previous assessments of intervention  
391 effectiveness<sup>4,5,8</sup>, phylodynamic survival analysis does not require any quantitative prior  
392 assumption or constraint on model parameters. The method should also be simple to  
393 implement and extend by leveraging the extensive software arsenal of survival  
394 modelling. Phylodynamic survival analysis may complement epidemiological models as  
395 pathogen sequences accumulate, allowing to address increasingly complex questions  
396 relevant to public health strategies.

397

## 398 **METHODS**

### 399 **Definitions and chronology of non-pharmaceutical interventions**

400 The nature, stringency and timing of non-pharmaceutical interventions against COVID-  
401 19 have been collected and aggregated daily since January 1, 2020 by the Oxford  
402 COVID-19 Government Response Tracker initiative of the Blavatnik School of  
403 Government, UK<sup>4,22</sup>. As of May 12, 2020, the interventions are grouped into three  
404 categories, namely: closures and containment (8 indicators), economic measures (4  
405 indicators) and health measures (5 indicators). Indicators use 2- to 4-level ordinal scales  
406 to represent each intervention's stringency, and an additional flag indicating whether the  
407 intervention is localized or general. Details of the coding methods for indicators can be  
408 found in<sup>40</sup>. We focused on large-scale interventions against transmission that did not  
409 target specific patients (for instance, we did not consider contact tracing) and we  
410 excluded economic and health interventions except for information campaigns. This  
411 rationale led to the selection of the 9 indicators shown in Table 1. To facilitate  
412 interpretation while constraining model complexity, the ordinal-scale indicators in  
413 OxCGRT data were recoded as binary variables in which we only considered  
414 government requirements (as opposed to recommendations) where applicable. We did  
415 not distinguish between localized and nation-wide interventions because localized  
416 interventions, especially in larger countries, targeted the identified epidemic hotspots.  
417 As the data did not allow to differentiate closures of schools and universities, we use the  
418 term 'education lockdown' (as opposed to 'school closure' in<sup>22</sup>) to avoid  
419 misinterpretation regarding the education levels concerned.

### 420 **Phylogenetic survival analysis in measurably evolving populations**

421 The original phylogenetic survival model in<sup>12</sup> and its later extensions<sup>41</sup> considered  
422 intervals backward in time, from the tips to the root of the tree, and were restricted to  
423 trees with all tips sampled at the same date relative to the root (ultrametric trees).  
424 Censored intervals (intervals that do not end with an event) in<sup>12</sup> were used to represent  
425 lineages with known sampling date but unknown age. In contrast, viral samples in

426 ongoing epidemics such as COVID-19 are typically collected through time. A significant  
427 evolution of the viruses during the sampling period violates the ultrametric assumption.  
428 To handle phylogenies of these so-called measurably evolving populations<sup>42</sup>, we  
429 propose a different interpretation of censoring compared to<sup>12</sup>. Going forward in time, the  
430 internal branches of a tree connect two divergence events while terminal branches,  
431 those that end with a tip, connect a divergence event and a sampling event (Fig. 1b).  
432 Thus, we considered internal branches as time-to-event intervals and terminal branches  
433 as censored intervals representing the minimal duration during which no divergence  
434 occurred (Fig. 1c).

### 435 **SARS-CoV-2 phylogenetic data**

436 SARS-CoV-2 genome sequences have been continuously submitted to the Global  
437 Initiative on Sharing All Influenza Data (GISAID) by laboratories worldwide<sup>21</sup>. To  
438 circumvent the computational limits of phylogeny reconstruction and time calibration  
439 techniques, the sequences of the GISAID database are subsampled before analysis by  
440 the Nextstrain initiative, using a balanced subsampling scheme through time and  
441 space<sup>20,43</sup>. Phylogenetic reconstruction uses maximum-likelihood phylogenetic inference  
442 based on IQ-TREE<sup>44</sup> and time-calibration uses TreeTime<sup>45</sup>. See<sup>46</sup> for further details on  
443 the Nextstrain bioinformatics pipeline. A dated phylogeny of 5,211 SARS-CoV-2  
444 genomes, along with sampling dates and locations, was retrieved from  
445 [nextstrain.org/ncov](https://nextstrain.org/ncov) on May 12, 2020. Genomes of non-human origin (n = 13) were  
446 discarded from analysis. Polytomies (unresolved divergences represented as a node  
447 with >2 descendants) were resolved as branches with an arbitrarily small length of 1  
448 hour, as recommended for adjustment of zero-length risk intervals in Cox regression<sup>47</sup>.  
449 Of note, excluding these zero-length branches would bias the analysis by  
450 underestimating the number of divergence events in specific regions of the phylogeny.  
451 Maximum-likelihood ancestral state reconstruction was used to assign internal nodes of  
452 the phylogeny to countries in a probabilistic fashion, taking the tree shape and sampling  
453 locations as input data<sup>48</sup>. To prepare data for survival analysis, we decomposed the  
454 branches of the dated phylogeny into a set of time-to-event and time-to-censoring

455 intervals (Fig. 1c). Intervals were assigned to the most likely country at the origin of the  
456 branch when this country's likelihood was  $>0.95$ . Intervals in which no country reached  
457 a likelihood of 0.95 were excluded from further analysis (Extended Data Figs. 1, 2).  
458 Finally, intervals during which a change of intervention occurred were split into sub-  
459 intervals, such that all covariates, including the country and interventions, were held  
460 constant within each sub-interval and only the last subinterval of an internal branch was  
461 treated as a time-to-event interval. This interval-splitting approach is consistent with an  
462 interpretation of interventions as external time-dependent covariates<sup>18</sup>, which are not  
463 dependent on the event under study, namely, the viral divergence event.

#### 464 **Mixed-effect Cox proportional hazard models**

465 Variations of the divergence rate  $\lambda$  in response to non-pharmaceutical interventions  
466 were modelled using mixed-effect Cox proportional hazard regression (reviewed in<sup>49</sup>).  
467 Models treated the country and phylogenetic branch as random effects to account for  
468 non-independence between sub-intervals of the same branch and between branches  
469 assigned to the same country. The predictors of interest were not heritable traits of  
470 SARS-CoV-2, thus, phylogenetic autocorrelation between intervals was not corrected  
471 for. Time-to-event data were visualized using Kaplan-Meier curves with 95% confidence  
472 intervals. The regression models had the form

$$473 \quad \lambda_i(t) = \lambda_0(t) \cdot \exp(X_i \cdot \beta + \alpha_j + \gamma_k)$$

474 where  $\lambda_i(t)$  is the hazard function (here, the divergence rate) at time  $t$  for the  $i$ th  
475 observation,  $\lambda_0(t)$  is the baseline hazard function, which is neither specified or explicitly  
476 evaluated,  $X_i$  is the set of predictors of the  $i$ th observation (the binary vector of active  
477 non-pharmaceutical interventions),  $\beta$  is the vector of fixed-effect coefficients,  $\alpha_j$  is the  
478 random intercept associated with the  $j$ th phylogenetic branch and  $\gamma_k$  is the random  
479 intercept associated with the  $k$ th country. Country comparison models (Fig. 2d), in  
480 which the country was the only predictor and branches were not divided into  
481 subintervals, did not include random intercepts. Raw model coefficients (the log-hazard  
482 ratios) additively shift the logarithm of the divergence rate  $\lambda$ . Exponentiated coefficients

483  $\exp \beta$  (the hazard ratios) are multiplicative factors (fold-changes) of the divergence rate.  
484 To ease interpretation, hazard ratios were reported as percentage changes of the  
485 divergence rate or, equivalently, of the effective reproduction number  $R_t$ , equal to  
486  $(\exp \beta - 1) \times 100$ . Analyses were conducted using R 3.6.1 (the R Foundation for  
487 Statistical Computing, Vienna, Austria) with additional packages *ape*, *survival* and  
488 *coxme*.

## 489 **Estimating the effect of combined interventions**

490 Pointwise estimates and confidence intervals of combined interventions were estimated  
491 by adding individual coefficients and their variance-covariances. Cox regression  
492 coefficients have approximately normal distribution with mean vector  $m$  and variance-  
493 covariance matrix  $V$ , estimated from the inverse Hessian matrix of the likelihood  
494 function evaluated at  $m$ . From well-known properties of the normal distribution, the  
495 distribution of a sum of normal deviates is normal with mean equal to the sum of the  
496 means and variance equal to the sum of the variance-covariance matrix of the deviates.  
497 Thus, the coefficient corresponding to a sum of coefficients with mean  $m$  and variance  $V$   
498 has mean  $\sum m$  and variance  $\sum V$ , from which we derive the point estimates and  
499 confidence intervals of a combination of predictors. Importantly, summing over the  
500 covariances captures the correlation between coefficients when estimating the  
501 uncertainty of the combined coefficient.

## 502 **Probability of stopping an epidemic**

503 A central question regarding the effectiveness of interventions or combinations thereof  
504 is whether their implementation can stop an epidemic by reducing  $R_t$  below 1 (Table 2).  
505 Suppose that some intervention has an estimated log-hazard ratio  $\hat{\beta}$ .  $\hat{\beta}$  has  
506 approximately normal distribution with mean  $\beta$  and variance  $\sigma^2$ , written  $\hat{\beta} \sim N(\beta, \sigma^2)$ .  
507 For some fixed value of  $R_0$ , the estimated post-intervention reproduction number  $\widehat{R}_t =$   
508  $R_0 \cdot \exp \hat{\beta}$ . The probability  $p$  that  $\widehat{R}_t < 1$  is  $\int_{-\infty}^1 d(\widehat{R}_t) d\widehat{R}_t$  where  $d$  denotes the probability  
509 density function. To solve the integral, remark that  $\log \widehat{R}_t = \log R_0 + \hat{\beta} \sim N(\log R_0 +$



510  $\hat{\beta}, \sigma^2$ ). Using a change of variables in the integral and noting that  $\log 1 = 0$ , we obtain  
511 the closed-form solution

512 
$$p = \int_{-\infty}^0 d(\log \widehat{R}_t) d \log \widehat{R}_t = \Phi(0 | \log R_0 + \hat{\beta}, \sigma^2),$$

513 where  $\Phi$  is the cumulative density function of the normal distribution with mean  $\log R_0 +$   
514  $\hat{\beta}$  and variance  $\sigma^2$ . By integrating over the coefficient distribution, this method explicitly  
515 considers the estimation uncertainty of  $\hat{\beta}$  when estimating  $p$ .

### 516 **Potential time-dependent confounders**

517 Time-dependent phylodynamic survival analysis assumes that variations of branch  
518 lengths though time directly reflect variations of the divergence rate, which implies that  
519 branch lengths are conditionally independent of time given the divergence rate. When  
520 the phylogeny is reconstructed from a fraction of the individuals, as is the case in  
521 virtually all phylodynamic studies including ours, this conditional independence  
522 assumption can be violated. This is because incomplete sampling increases the length  
523 of more recent branches relative to older branches<sup>50</sup>, an effect called the diversification  
524 slowdown<sup>51,52</sup>. Noteworthy, this effect can be counteracted by a high extinction rate<sup>17,50</sup>,  
525 which is expected in our setting and mimicks an acceleration of diversification.  
526 Moreover, whether the diversification slowdown should be interpreted as a pure artifact  
527 has been controversial<sup>52,53</sup>. Notwithstanding, we considered incomplete sampling as a  
528 potential source of bias in our analyses because a diversification slowdown might lead  
529 to an overestimation of the effect of non-pharmaceutical interventions. Additionally, the  
530 selection procedure used by Nextstrain to collect genomes included in the dated  
531 phylogeny possibly amplified the diversification slowdown by using a higher sampling  
532 fraction in earlier phases of the epidemic<sup>43</sup>. To verify whether the conclusions of our  
533 models were robust to this potential bias, we built an additional multivariable model  
534 including the estimated date of each divergence event (the origin of the branch) as a  
535 covariate. The possible relation between time and the divergence rate is expectedly  
536 non-linear<sup>50</sup> and coefficient variations resulting from controlling for time were moderate



537 (Extended Data Table 1), thus, we refrained from including a time covariate in the  
538 reported regression models as this might lead to overcontrol. Further research is  
539 warranted to identify an optimal function of time that might be included as a covariate in  
540 phylodynamic survival models to control for sources of diversification slowdown.

## 541 **Compartmental epidemiological models**

542 Epidemic dynamics can be described by partitioning a population of size  $N$  into three  
543 compartments, the susceptible hosts  $S$ , the infected hosts  $I$ , and the recovered hosts  $R$ .  
544 The infection rate  $b$  governs the transitions from  $S$  to  $I$  and the recovery rate  $g$  governs  
545 the transitions from  $I$  to  $R$  (we avoid the standard notation  $\beta$  and  $\gamma$  for infection and  
546 recovery rates to prevent confusion with Cox model parameters). The SIR model  
547 describes the transition rates between compartments as a set of differential equations  
548 with respect to time  $t$ ,

$$549 \quad \frac{dS}{dt} = -bSI, \quad \frac{dI}{dt} = bSI - gI, \quad \frac{dR}{dt} = gI.$$

550 The transition rates of the SIR model define the basic reproduction number of the  
551 epidemic,  $R_0 = b/g$ . From a phylodynamic standpoint, if the population dynamics of a  
552 pathogen is described as a birth-death model with divergence rate  $\lambda$  and extinction rate  
553  $\mu$ , then  $R_t = \lambda/\mu$  or, alternatively,  $R_t = \frac{\lambda - \mu}{g} + 1$ <sup>54</sup>. We simulated the epidemiological  
554 impact of each individual intervention in SIR models with  $R_0 = 3$  and  $g^{-1} = 2$  weeks  
555 based on previous estimates<sup>24,25</sup>, yielding a baseline infection rate  $b = gR_0 = 6$ . In each  
556 model, the effective infection rate changed from  $b$  to  $b \cdot \exp \beta$  on the implementation  
557 date of an intervention with log-hazard ratio  $\beta$ . To determine realistic implementation  
558 delays, the starting time of the simulation was set at the date of the first local divergence  
559 event in each country and the implementation date was set to the observed median  
560 delay across countries (see Fig. 3a). All models started with 100 infected individuals at  
561  $t = 0$ , a value assumed to reflect the number of unobserved cases at the date of the  
562 first divergence event, based on the temporality between the divergence events and the  
563 reported cases (Extended Data Fig. 3) and on a previous estimate from the U.S.

564 suggesting that the total number of cases might be two orders of magnitude larger than  
565 the reported count<sup>55</sup>. Evaluation of the SIR models used the R package *deSolve*.

566 **Data and software availability**

567 All data and software code used to generate the results are available at  
568 [github.com/rasigadelab/covid-npi](https://github.com/rasigadelab/covid-npi).

569

## References

- 570 1. Wu, F., Zhao, S., Yu, B., Chen, Y.-M., Wang, W., Song, Z.-G., Hu, Y., Tao, Z.-W.,  
571 Tian, J.-H., Pei, Y.-Y., Yuan, M.-L., Zhang, Y.-L., Dai, F.-H., Liu, Y., Wang, Q.-M.,  
572 Zheng, J.-J., Xu, L., Holmes, E. C. & Zhang, Y.-Z. A new coronavirus associated  
573 with human respiratory disease in China. *Nature* **579**, 265–269 (2020).
- 574 2. Zhou, P., Yang, X.-L., Wang, X.-G., Hu, B., Zhang, L., Zhang, W., Si, H.-R., Zhu, Y.,  
575 Li, B., Huang, C.-L., Chen, H.-D., Chen, J., Luo, Y., Guo, H., Jiang, R.-D., Liu, M.-  
576 Q., Chen, Y., Shen, X.-R., Wang, X., Zheng, X.-S., Zhao, K., Chen, Q.-J., Deng, F.,  
577 Liu, L.-L., Yan, B., Zhan, F.-X., Wang, Y.-Y., Xiao, G.-F. & Shi, Z.-L. A pneumonia  
578 outbreak associated with a new coronavirus of probable bat origin. *Nature* **579**, 270–  
579 273 (2020).
- 580 3. Zhu, N., Zhang, D., Wang, W., Li, X., Yang, B., Song, J., Zhao, X., Huang, B., Shi,  
581 W., Lu, R., Niu, P., Zhan, F., Ma, X., Wang, D., Xu, W., Wu, G., Gao, G. F. & Tan,  
582 W. A Novel Coronavirus from Patients with Pneumonia in China, 2019. *New*  
583 *England Journal of Medicine* **382**, 727–733 (2020).
- 584 4. Brauner, J. M., Mindermann, S., Sharma, M., Stephenson, A. B., Gavenčiak, T.,  
585 Johnston, D., Leech, G., Salvatier, J., Altman, G., Norman, A. J., Monrad, J. T.,  
586 Besiroglu, T., Ge, H., Mikulik, V., Hartwick, M. A., Teh, Y. W., Chindelevitch, L., Gal,  
587 Y. & Kulveit, J. The effectiveness of eight nonpharmaceutical interventions against  
588 COVID-19 in 41 countries. *medRxiv* 2020.05.28.20116129 (2020).  
589 doi:10.1101/2020.05.28.20116129
- 590 5. Flaxman, S., Mishra, S., Gandy, A., Unwin, H. J. T., Mellan, T. A., Coupland, H.,  
591 Whittaker, C., Zhu, H., Berah, T., Eaton, J. W., Monod, M., Ghani, A. C., Donnelly,  
592 C. A., Riley, S. M., Vollmer, M. A. C., Ferguson, N. M., Okell, L. C. & Bhatt, S.  
593 Estimating the effects of non-pharmaceutical interventions on COVID-19 in Europe.  
594 *Nature* 1–8 (2020). doi:10.1038/s41586-020-2405-7
- 595 6. Li, Y., Campbell, H., Kulkarni, D., Harpur, A., Nundy, M., Wang, X. & Nair, H. The  
596 temporal association of introducing and lifting non-pharmaceutical interventions with  
597 the time-varying reproduction number (R) of SARS-CoV-2: a modelling study across  
598 131 countries. *The Lancet Infectious Diseases* **0**, (2020).
- 599 7. Bayham, J. & Fenichel, E. P. Impact of school closures for COVID-19 on the US  
600 health-care workforce and net mortality: a modelling study. *The Lancet Public Health*  
601 **0**, (2020).
- 602 8. Dehning, J., Zierenberg, J., Spitzner, F. P., Wibral, M., Neto, J. P., Wilczek, M. &  
603 Priesemann, V. Inferring change points in the spread of COVID-19 reveals the  
604 effectiveness of interventions. *Science* (2020). doi:10.1126/science.abb9789
- 605 9. Flaxman, S., Mishra, S., Gandy, A., Unwin, H., Coupland, H., Mellan, T., Zhu, H.,  
606 Berah, T., Eaton, J., Perez Guzman, P., Schmit, N., Cilloni, L., Ainslie, K., Baguelin,  
607 M., Blake, I., Boonyasiri, A., Boyd, O., Cattarino, L., Ciavarella, C., Cooper, L.,  
608 Cucunuba Perez, Z., Cuomo-Dannenburg, G., Dighe, A., Djaafara, A., Dorigatti, I.,

- 609 Van Elsland, S., Fitzjohn, R., Fu, H., Gaythorpe, K., Geidelberg, L., Grassly, N.,  
610 Green, W., Hallett, T., Hamlet, A., Hinsley, W., Jeffrey, B., Jorgensen, D., Knock, E.,  
611 Laydon, D., Nedjati Gilani, G., Nouvellet, P., Parag, K., Siveroni, I., Thompson, H.,  
612 Verity, R., Volz, E., Walters, C., Wang, H., Wang, Y., Watson, O., Winskill, P., Xi, X.,  
613 Whittaker, C., Walker, P., Ghani, A., Donnelly, C., Riley, S., Okell, L., Vollmer, M.,  
614 Ferguson, N. & Bhatt, S. *Report 13: Estimating the number of infections and the  
615 impact of non-pharmaceutical interventions on COVID-19 in 11 European countries.*  
616 (Imperial College London, 2020). doi:10.25561/77731
- 617 10. Banholzer, N., Weenen, E. van, Kratzwald, B., Seeliger, A., Tschernutter, D.,  
618 Bottrighi, P., Cenedese, A., Salles, J. P., Vach, W. & Feuerriegel, S. Impact of non-  
619 pharmaceutical interventions on documented cases of COVID-19. *medRxiv*  
620 2020.04.16.20062141 (2020). doi:10.1101/2020.04.16.20062141
- 621 11. Volz, E. M., Koelle, K. & Bedford, T. Viral phylodynamics. *PLoS Comput. Biol.* **9**,  
622 e1002947 (2013).
- 623 12. Paradis, E. Assessing temporal variations in diversification rates from phylogenies:  
624 estimation and hypothesis testing. *Proceedings of the Royal Society of London.*  
625 *Series B: Biological Sciences* **264**, 1141–1147 (1997).
- 626 13. Rabosky, D. L. Likelihood Methods for Detecting Temporal Shifts in Diversification  
627 Rates. *Evolution* **60**, 1152–1164 (2006).
- 628 14. The effective reproduction number of an epidemic can be interpreted as the average  
629 number of new infections directly caused by a single infected patient. The effective  
630 reproduction number equals the basic reproduction number  $R_0$  in a fully susceptible  
631 population when no mitigation strategy is active.
- 632 15. Tj, N., Tw, K., Jb, K., Cb, D. & Dp, P. Speciation in North American black basses,  
633 *Micropterus* (Actinopterygii: Centrarchidae). *Evolution* **57**, 1610–1621 (2003).
- 634 16. Ma, Z. & Krings, A. W. Survival Analysis Modeling of Phylogenetic and Coalescent  
635 Trees. in *2008 International Conference on BioMedical Engineering and Informatics*  
636 **1**, 178–185 (2008).
- 637 17. Nee, S. Inferring Speciation Rates from Phylogenies. *Evolution* **55**, 661–668 (2001).
- 638 18. Fisher, L. D. & Lin, D. Y. Time-dependent covariates in the Cox proportional-  
639 hazards regression model. *Annu Rev Public Health* **20**, 145–157 (1999).
- 640 19. Stadler, T., Kühnert, D., Bonhoeffer, S. & Drummond, A. J. Birth-death skyline plot  
641 reveals temporal changes of epidemic spread in HIV and hepatitis C virus (HCV).  
642 *Proc. Natl. Acad. Sci. U.S.A.* **110**, 228–233 (2013).
- 643 20. Hadfield, J., Megill, C., Bell, S. M., Huddleston, J., Potter, B., Callender, C.,  
644 Sagulenko, P., Bedford, T. & Neher, R. A. Nextstrain: real-time tracking of pathogen  
645 evolution. *Bioinformatics* **34**, 4121–4123 (2018).
- 646 21. Shu, Y. & McCauley, J. GISAID: Global initiative on sharing all influenza data - from  
647 vision to reality. *Euro Surveill.* **22**, (2017).

- 648 22. Hale, T., Webster, S., Petherick, A., Philips, T. & Kira, B. Coronavirus Government  
649 Response Tracker. *Oxford COVID-19 Government Response Tracker, Blavatnik*  
650 *School of Government. Data use policy: Creative Commons Attribution CC BY*  
651 *standard.* (2020). at <[https://www.bsg.ox.ac.uk/research/research-](https://www.bsg.ox.ac.uk/research/research-projects/coronavirus-government-response-tracker)  
652 [projects/coronavirus-government-response-tracker](https://www.bsg.ox.ac.uk/research/research-projects/coronavirus-government-response-tracker)>
- 653 23. Ali, S. T., Wang, L., Lau, E. H. Y., Xu, X.-K., Du, Z., Wu, Y., Leung, G. M. & Cowling,  
654 B. J. Serial interval of SARS-CoV-2 was shortened over time by nonpharmaceutical  
655 interventions. *Science* (2020). doi:10.1126/science.abc9004
- 656 24. Xu, K., Chen, Y., Yuan, J., Yi, P., Ding, C., Wu, W., Li, Y., Ni, Q., Zou, R., Li, X., Xu,  
657 M., Zhang, Y., Zhao, H., Zhang, X., Yu, L., Su, J., Lang, G., Liu, J., Wu, X., Guo, Y.,  
658 Tao, J., Shi, D., Yu, L., Cao, Q., Ruan, B., Liu, L., Wang, Z., Xu, Y., Liu, Y., Sheng,  
659 J. & Li, L. Factors Associated With Prolonged Viral RNA Shedding in Patients with  
660 Coronavirus Disease 2019 (COVID-19). *Clin Infect Dis* doi:10.1093/cid/ciaa351
- 661 25. Bi, Q., Wu, Y., Mei, S., Ye, C., Zou, X., Zhang, Z., Liu, X., Wei, L., Truelove, S. A.,  
662 Zhang, T., Gao, W., Cheng, C., Tang, X., Wu, X., Wu, Y., Sun, B., Huang, S., Sun,  
663 Y., Zhang, J., Ma, T., Lessler, J. & Feng, T. Epidemiology and transmission of  
664 COVID-19 in 391 cases and 1286 of their close contacts in Shenzhen, China: a  
665 retrospective cohort study. *The Lancet Infectious Diseases* **0**, (2020).
- 666 26. Zhang, J., Litvinova, M., Liang, Y., Wang, Y., Wang, W., Zhao, S., Wu, Q., Merler,  
667 S., Viboud, C., Vespignani, A., Ajelli, M. & Yu, H. Changes in contact patterns shape  
668 the dynamics of the COVID-19 outbreak in China. *Science* **368**, 1481–1486 (2020).
- 669 27. Salje, H., Tran Kiem, C., Lefrancq, N., Courtejoie, N., Bosetti, P., Paireau, J.,  
670 Andronico, A., Hozé, N., Richet, J., Dubost, C.-L., Le Strat, Y., Lessler, J., Levy-  
671 Bruhl, D., Fontanet, A., Opatowski, L., Boelle, P.-Y. & Cauchemez, S. Estimating the  
672 burden of SARS-CoV-2 in France. *Science* (2020). doi:10.1126/science.abc3517
- 673 28. Davies, N. G., Kucharski, A. J., Eggo, R. M., Gimma, A., Edmunds, W. J. & Centre  
674 for the Mathematical Modelling of Infectious Diseases COVID-19 working group.  
675 Effects of non-pharmaceutical interventions on COVID-19 cases, deaths, and  
676 demand for hospital services in the UK: a modelling study. *Lancet Public Health* **5**,  
677 e375–e385 (2020).
- 678 29. Heavey, L., Casey, G., Kelly, C., Kelly, D. & McDarby, G. No evidence of secondary  
679 transmission of COVID-19 from children attending school in Ireland, 2020.  
680 *Eurosurveillance* **25**, 2000903 (2020).
- 681 30. Davies, N. G., Klepac, P., Liu, Y., Prem, K., Jit, M. & Eggo, R. M. Age-dependent  
682 effects in the transmission and control of COVID-19 epidemics. *Nature Medicine* 1–7  
683 (2020). doi:10.1038/s41591-020-0962-9
- 684 31. Gonzalez, T., de la Rubia, M. A., Hincz, K. P., Comas-Lopez, M., Subirats, L., Fort,  
685 S. & Sacha, G. M. Influence of COVID-19 confinement on students' performance in  
686 higher education. *PLoS One* **15**, e0239490 (2020).
- 687 32. Ashikalli, L., Carroll, W. & Johnson, C. The indirect impact of COVID-19 on child  
688 health. *Paediatr Child Health (Oxford)* (2020). doi:10.1016/j.paed.2020.09.004

- 689 33. Fafi-Kremer, S., Bruel, T., Madec, Y., Grant, R., Tondeur, L., Grzelak, L., Staropoli,  
690 I., Anna, F., Souque, P., Mutter, C., Collongues, N., Bolle, A., Velay, A., Lefebvre,  
691 N., Mielcarek, M., Meyer, N., Rey, D., Charneau, P., Hoen, B., Seze, J. D.,  
692 Schwartz, O. & Fontanet, A. Serologic responses to SARS-CoV-2 infection among  
693 hospital staff with mild disease in eastern France. *medRxiv* 2020.05.19.20101832  
694 (2020). doi:10.1101/2020.05.19.20101832
- 695 34. Shim, E., Tariq, A., Choi, W., Lee, Y. & Chowell, G. Transmission potential and  
696 severity of COVID-19 in South Korea. *Int. J. Infect. Dis.* **93**, 339–344 (2020).
- 697 35. Aschwanden, C. How Superspreading Events Drive Most COVID-19 Spread.  
698 *Scientific American* at <[https://www.scientificamerican.com/article/how-](https://www.scientificamerican.com/article/how-superspreading-events-drive-most-covid-19-spread1/)  
699 [superspreading-events-drive-most-covid-19-spread1/](https://www.scientificamerican.com/article/how-superspreading-events-drive-most-covid-19-spread1/)>
- 700 36. Bray, S. R. & Wang, B. Forecasting unprecedented ecological fluctuations. *PLoS*  
701 *Comput. Biol.* **16**, e1008021 (2020).
- 702 37. Kain, M. P., Childs, M. L., Becker, A. D. & Mordecai, E. A. Chopping the tail: how  
703 preventing superspreading can help to maintain COVID-19 control. *medRxiv*  
704 2020.06.30.20143115 (2020). doi:10.1101/2020.06.30.20143115
- 705 38. Rapid Risk Assessment: Coronavirus disease 2019 (COVID-19) in the EU/EEA and  
706 the UK – tenth update. *European Centre for Disease Prevention and Control* (2020).  
707 at <[https://www.ecdc.europa.eu/en/publications-data/rapid-risk-assessment-](https://www.ecdc.europa.eu/en/publications-data/rapid-risk-assessment-coronavirus-disease-2019-covid-19-pandemic-tenth-update)  
708 [coronavirus-disease-2019-covid-19-pandemic-tenth-update](https://www.ecdc.europa.eu/en/publications-data/rapid-risk-assessment-coronavirus-disease-2019-covid-19-pandemic-tenth-update)>
- 709 39. Lemey, P., Hong, S. L., Hill, V., Baele, G., Poletto, C., Colizza, V., O’Toole, Á.,  
710 McCrone, J. T., Andersen, K. G., Worobey, M., Nelson, M. I., Rambaut, A. &  
711 Suchard, M. A. Accommodating individual travel history and unsampled diversity in  
712 Bayesian phylogeographic inference of SARS-CoV-2. *Nat Commun* **11**, 5110  
713 (2020).
- 714 40. Variation in government responses to COVID-19. at  
715 <[https://www.bsg.ox.ac.uk/research/publications/variation-government-responses-](https://www.bsg.ox.ac.uk/research/publications/variation-government-responses-covid-19)  
716 [covid-19](https://www.bsg.ox.ac.uk/research/publications/variation-government-responses-covid-19)>
- 717 41. Paradis, E. Statistical Analysis of Diversification with Species Traits. *Evolution* **59**,  
718 1–12 (2005).
- 719 42. Biek, R., Pybus, O. G., Lloyd-Smith, J. O. & Didelot, X. Measurably evolving  
720 pathogens in the genomic era. *Trends Ecol. Evol. (Amst.)* **30**, 306–313 (2015).
- 721 43. *nextstrain/ncov*. (Nextstrain, 2020). at <<https://github.com/nextstrain/ncov>>
- 722 44. Minh, B. Q., Schmidt, H. A., Chernomor, O., Schrempf, D., Woodhams, M. D., von  
723 Haeseler, A. & Lanfear, R. IQ-TREE 2: New Models and Efficient Methods for  
724 Phylogenetic Inference in the Genomic Era. *Mol. Biol. Evol.* **37**, 1530–1534 (2020).
- 725 45. Sagulenko, P., Puller, V. & Neher, R. A. TreeTime: Maximum-likelihood  
726 phylodynamic analysis. *Virus Evol* **4**, (2018).
- 727 46. Orientation: so, what does Nextstrain do? *Tutorial: Using Nextstrain for SARS-CoV-*  
728 *2* at <<https://nextstrain.github.io/ncov/orientation-workflow.html>>



- 729 47. Therneau, T. M. & Grambsch, P. M. *Modeling Survival Data: Extending the Cox*  
730 *Model*. (Springer Science & Business Media, 2013).
- 731 48. Pagel, M. The Maximum Likelihood Approach to Reconstructing Ancestral Character  
732 States of Discrete Characters on Phylogenies. *Syst Biol* **48**, 612–622 (1999).
- 733 49. Austin, P. C. A Tutorial on Multilevel Survival Analysis: Methods, Models and  
734 Applications. *International Statistical Review* **85**, 185–203 (2017).
- 735 50. Nee, S., May, R. M. & Harvey, P. H. The reconstructed evolutionary process. *Philos.*  
736 *Trans. R. Soc. Lond., B, Biol. Sci.* **344**, 305–311 (1994).
- 737 51. Hedges, S. B., Marin, J., Suleski, M., Paymer, M. & Kumar, S. Tree of Life Reveals  
738 Clock-Like Speciation and Diversification. *Mol Biol Evol* **32**, 835–845 (2015).
- 739 52. Etienne, R. S. & Rosindell, J. Prolonging the past counteracts the pull of the present:  
740 protracted speciation can explain observed slowdowns in diversification. *Syst. Biol.*  
741 **61**, 204–213 (2012).
- 742 53. Nabhan, A. R. & Sarkar, I. N. The impact of taxon sampling on phylogenetic  
743 inference: a review of two decades of controversy. *Brief Bioinform* **13**, 122–134  
744 (2012).
- 745 54. Pybus, O. G., Charleston, M. A., Gupta, S., Rambaut, A., Holmes, E. C. & Harvey,  
746 P. H. The epidemic behavior of the hepatitis C virus. *Science* **292**, 2323–2325  
747 (2001).
- 748 55. Silverman, J. D., Hupert, N. & Washburne, A. D. Using influenza surveillance  
749 networks to estimate state-specific prevalence of SARS-CoV-2 in the United States.  
750 *Science Translational Medicine* (2020). doi:10.1126/scitranslmed.abc1126  
751

752 **Acknowledgements:** We thank Philip Supply, François Vandenesch, Jean-Sébastien  
753 Casalegno, Vanessa Escuret, and Christophe Ramière for fruitful discussions and  
754 reviews of our work. We thank the GISAID, Nextstrain and OxCGRT teams for making  
755 their high-quality datasets available to the community. A list of authors and laboratories  
756 contributing SARS-CoV-2 genome sequences is shown in Extended Data Table 3.

757 **Funding:** JPR received support from the FINOVI Foundation (grant R18037CC).

758 **Author contributions:** JPR, LJ, TW designed research. JPR, ABarray, JTS, CQ, YV,  
759 GD, LJ conducted research. JPR, TW analyzed the data. JPR created figures. JPR, Abal,  
760 GD, LJ, PV, BL, TW interpreted the data. All authors wrote the paper.

761 **Competing interests:** BL is currently active in groups advising the French government  
762 for which BL is not receiving payment.

763 **Data and material availability:** Data and analysis code are available online at  
764 <https://github.com/rasigadelab/covid-npi>.



765        **EXTENDED DATA**

766        Extended Data Figures 1 to 8 included below

767        Extended Data Tables 1 and 2 included below

768        **Other Supplementary Information for this manuscript include the following:**

769        Extended Data Table 3. Number of samples, phylogenetic branches, and dates of first  
770        detected SARS-CoV-2 local transmission events and non-pharmaceutical interventions  
771        in 74 countries. (.xlsx spreadsheet)

772        Extended Data Table 4. Detailed timeline of implementation and release of non-  
773        pharmaceutical interventions against COVID-19 in 74 countries up to May 12, 2020.  
774        (.xlsx spreadsheet)

775        Extended Data Table 5. Authors and laboratories having contributed SARS-CoV-2  
776        genomes included in the dated phylogeny. (.xlsx spreadsheet)

777

778

779

780

781

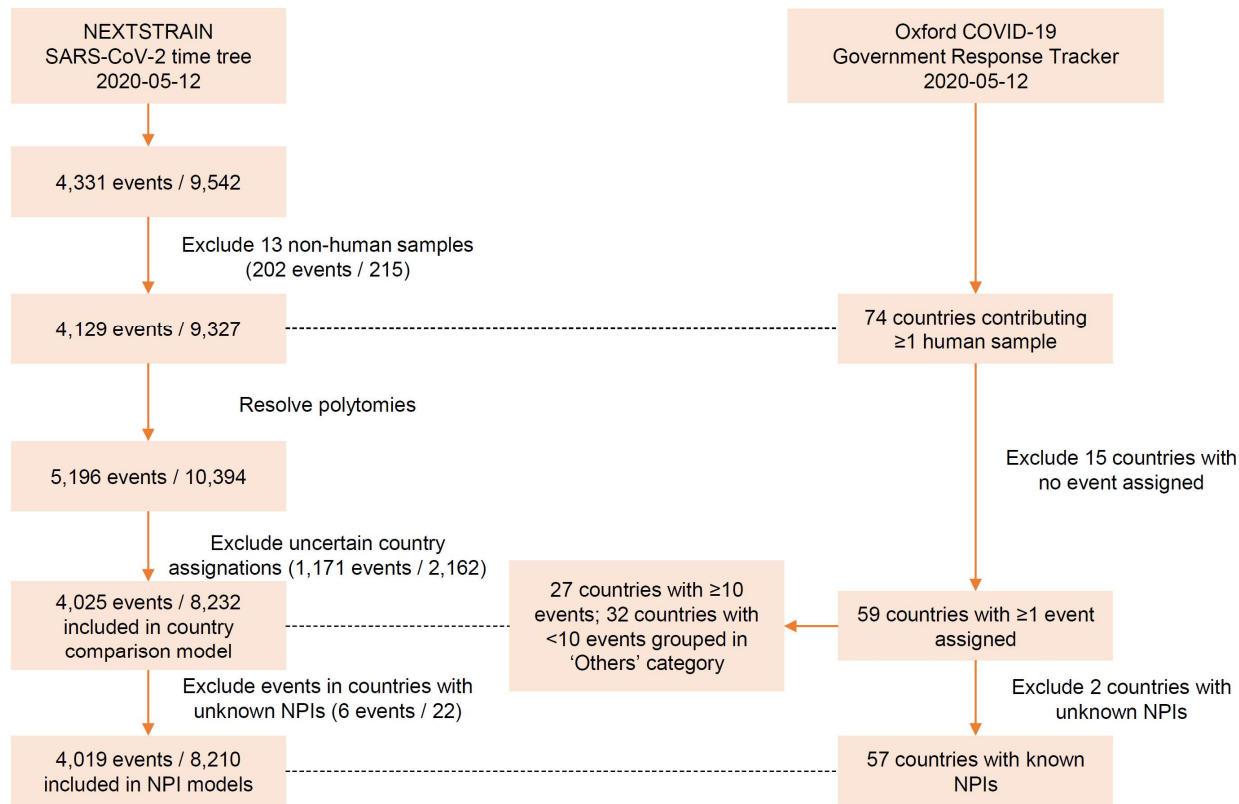

782

783

784 **Extended Data Figure 1. Flowchart of data selection.** Events are phylogenetic divergences  
 785 (tree nodes in the SARS-CoV-2 phylogeny), excluding tree root. Polytomies are unresolved tree  
 786 nodes representing >1 divergence event. Polytomies were resolved into dichotomies (nodes  
 787 with exactly 1 divergence) with arbitrarily small interval length. NPI, non-pharmaceutical  
 788 intervention against COVID-19.

789

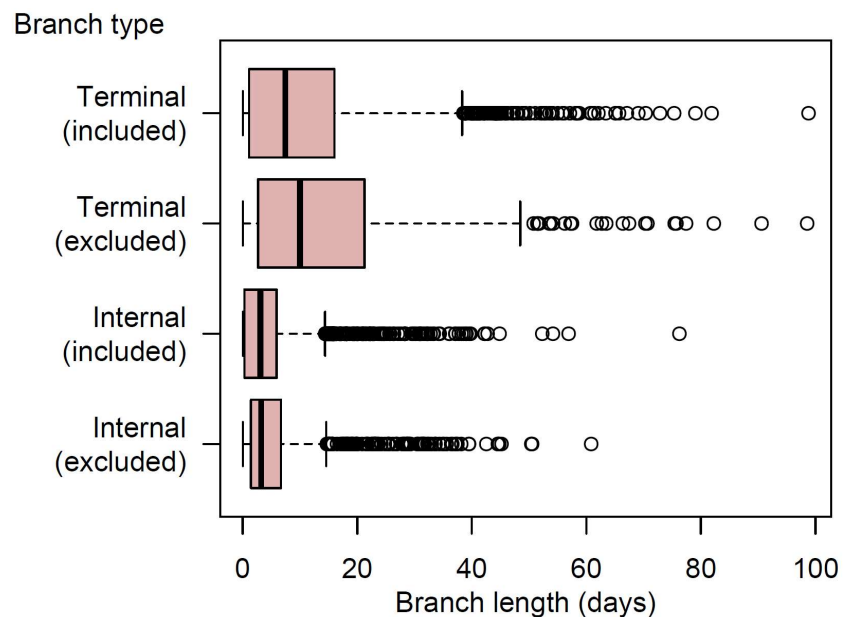

790

791

792

793

794

795

796

797

**Extended Data Figure 2. Length distribution in phylogenetic branches with uncertain country assignment.** Shown are box-and-whisker plots of the lengths of internal and terminal branches, depending on branch exclusion due to uncertain (<95% confidence) country assignment. Boxes denote interquartile range (IQR) and median, whiskers extend to lengths at most 1.5x the IQR away from the median length, and circle marks denote lengths farther than 1.5 IQR from the median length.

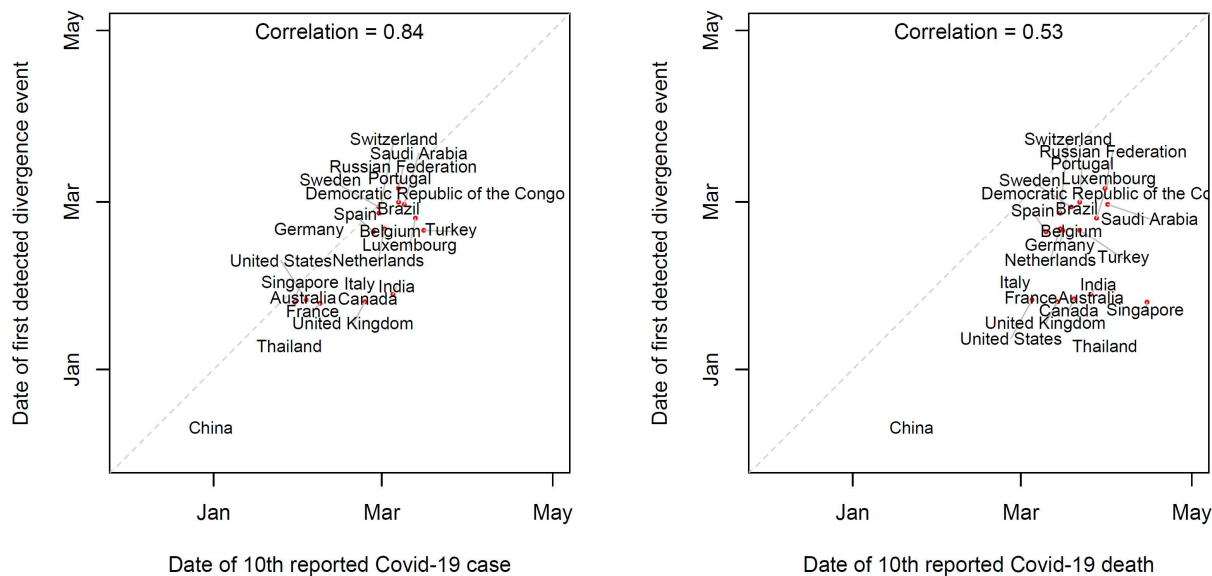

798

799

800

801

802

803

804

**Extended Data Figure 3. Correlation of reported and estimated epidemic onset dates.** Dates of first estimated autochthonous SARS-CoV-2 transmission per country relative to the dates of the 10<sup>th</sup> reported case (left panel) and the 10<sup>th</sup> reported death (right panel) in countries with at least 15 assigned internal branches.

805

|                                | No. of countries (%) | Information campaign | Restrict intl. travel | Education lockdown | Cancel public events | Restrict gatherings >100 pers. | Close workplaces | Restrict internal movements | Close public transport | Home containment |
|--------------------------------|----------------------|----------------------|-----------------------|--------------------|----------------------|--------------------------------|------------------|-----------------------------|------------------------|------------------|
| Information campaign           | 57 (100.0)           | 1.00                 | 0.96                  | 0.96               | 0.93                 | 0.89                           | 0.93             | 0.79                        | 0.35                   | 0.72             |
| Restrict intl. travel          | 55 (96.5)            | 1.00                 | 1.00                  | 0.96               | 0.93                 | 0.89                           | 0.93             | 0.79                        | 0.36                   | 0.72             |
| Education lockdown             | 55 (96.5)            | 1.00                 | 0.96                  | 1.00               | 0.96                 | 0.91                           | 0.96             | 0.82                        | 0.36                   | 0.75             |
| Cancel public events           | 53 (93.0)            | 1.00                 | 0.96                  | 1.00               | 1.00                 | 0.94                           | 0.98             | 0.85                        | 0.38                   | 0.77             |
| Restrict gatherings >100 pers. | 51 (89.5)            | 1.00                 | 0.96                  | 0.98               | 0.98                 | 1.00                           | 0.98             | 0.83                        | 0.38                   | 0.76             |
| Close workplaces               | 53 (93.0)            | 1.00                 | 0.96                  | 1.00               | 0.98                 | 0.94                           | 1.00             | 0.83                        | 0.38                   | 0.76             |
| Restrict internal movements    | 45 (78.9)            | 1.00                 | 0.96                  | 1.00               | 1.00                 | 0.94                           | 0.98             | 1.00                        | 0.43                   | 0.87             |
| Close public transport         | 20 (35.1)            | 1.00                 | 1.00                  | 1.00               | 1.00                 | 0.98                           | 1.00             | 0.98                        | 1.00                   | 0.93             |
| Home containment               | 41 (71.9)            | 1.00                 | 0.96                  | 1.00               | 1.00                 | 0.94                           | 0.98             | 0.96                        | 0.45                   | 1.00             |

806

807

808 **Extended Data Figure 4. Frequency and timing of implementation of non-pharmaceutical**  
 809 **interventions in 57 countries.** The first column shows the number and percentage of countries  
 810 implementing each intervention, independent of other interventions. Matrix cells show the  
 811 proportion of countries implementing the intervention in column conditional on the  
 812 implementation of the intervention in row.

813

814

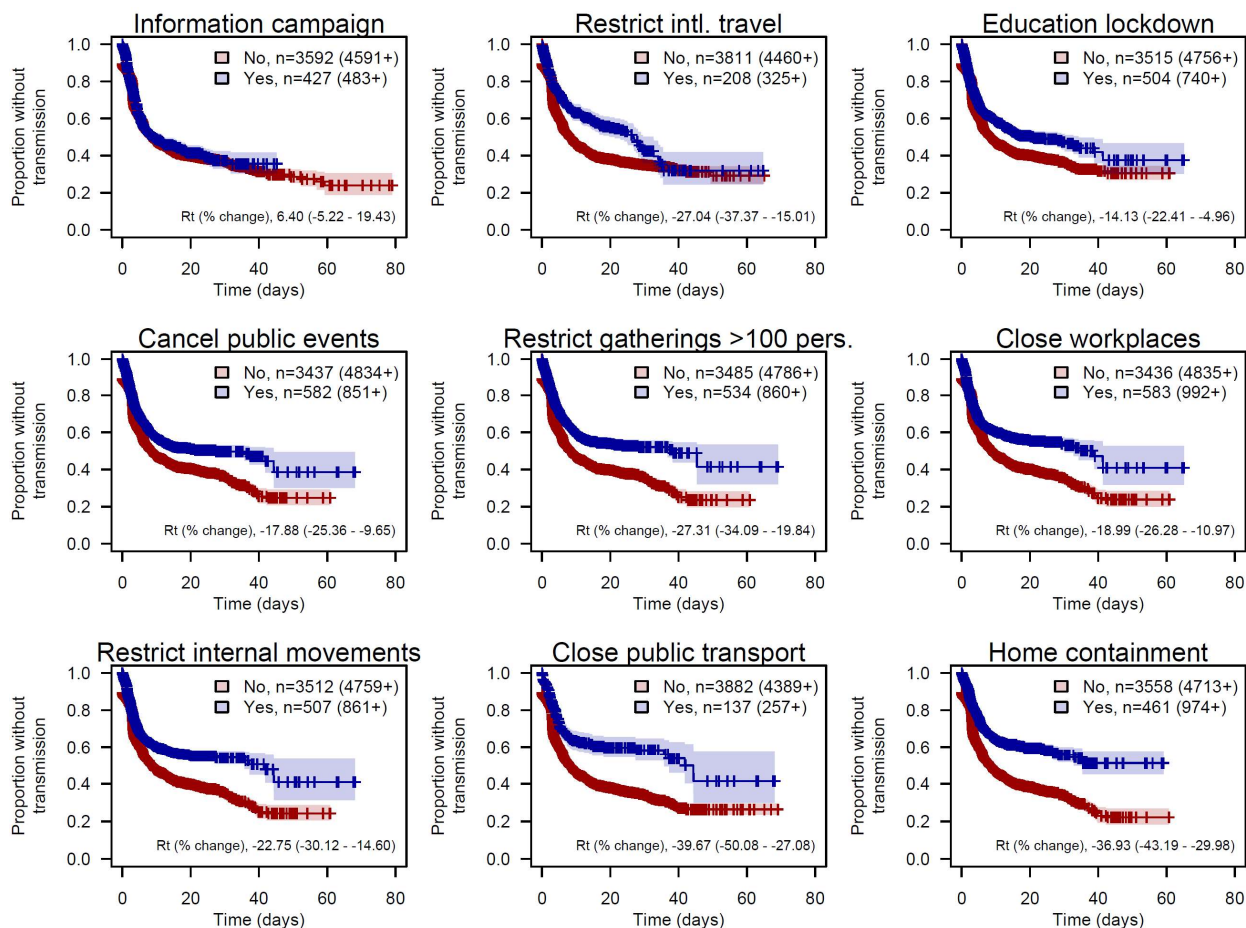

815

816

817

818

819

820

821

822

823

824

825

826

827

828

829

**Extended Data Figure 5. Non-pharmaceutical interventions against COVID-19 correlate with reduced effective reproduction numbers.** Data derive from a dated phylogeny of SARS-CoV-2 genomes from 57 countries, with 4,191 internal branches interpreted as time-to-event intervals, and 4,019 terminal branches interpreted as censored intervals, after exclusion of branches with uncertain country assignment. Shown are Kaplan-Meier survival curves of the waiting time without a viral transmission event, stratified on the presence of nine non-pharmaceutical interventions active or not in each country. Sample sizes denote, for each stratum, the no. of time-to-event subintervals (possibly resulting from splitting intervals containing a change of intervention) and, in brackets, the no. of censored subintervals. Percent changes of the effective reproduction number  $R_t$  were derived from separate time-dependent mixed-effect Cox regression models treating the country and the branch as random effects.

|                                | Information campaign | Restrict intl. travel | Education lockdown | Cancel public events | Restrict gatherings >100 pers. | Close workplaces | Restrict internal movements | Close public transport | Home containment |
|--------------------------------|----------------------|-----------------------|--------------------|----------------------|--------------------------------|------------------|-----------------------------|------------------------|------------------|
| Information campaign           | 0.0                  | 8.0                   | 14.0               | 19.0                 | 21.0                           | 25.0             | 27.0                        | 24.5                   | 28.0             |
| Restrict intl. travel          | -8.0                 | 0.0                   | 1.0                | 3.0                  | 9.0                            | 10.0             | 13.0                        | 10.5                   | 13.0             |
| Education lockdown             | -14.0                | -1.0                  | 0.0                | 0.0                  | 1.0                            | 5.0              | 8.0                         | 11.5                   | 9.0              |
| Cancel public events           | -19.0                | -3.0                  | 0.0                | 0.0                  | 0.0                            | 5.0              | 7.0                         | 11.5                   | 10.0             |
| Restrict gatherings >100 pers. | -21.0                | -9.0                  | -1.0               | 0.0                  | 0.0                            | 3.0              | 4.0                         | 5.0                    | 4.5              |
| Close workplaces               | -25.0                | -10.0                 | -5.0               | -5.0                 | -3.0                           | 0.0              | 0.0                         | 1.0                    | 1.0              |
| Restrict internal movements    | -27.0                | -13.0                 | -8.0               | -7.0                 | -4.0                           | 0.0              | 0.0                         | 3.0                    | 0.0              |
| Close public transport         | -24.5                | -10.5                 | -11.5              | -11.5                | -5.0                           | -1.0             | -3.0                        | 0.0                    | 1.0              |
| Home containment               | -28.0                | -13.0                 | -9.0               | -10.0                | -4.5                           | -1.0             | 0.0                         | -1.0                   | 0.0              |

830

831

832

833

834

835

836

**Extended Data Figure 6. Median delay between implementation of non-pharmaceutical interventions.** Shown are the median days elapsed between the implementation of the intervention in the row and that of the intervention in the column, where median is taken across countries that implemented both interventions.



|                                | Information campaign | Restrict intl. travel | Education lockdown | Cancel public events | Restrict gatherings >100 pers. | Close workplaces | Restrict internal movements | Close public transport | Home containment |
|--------------------------------|----------------------|-----------------------|--------------------|----------------------|--------------------------------|------------------|-----------------------------|------------------------|------------------|
| Information campaign           |                      | 0.55                  | 0.59               | 0.62                 | 0.48                           | 0.56             | 0.48                        | 0.08                   | 0.47             |
| Restrict intl. travel          | 0.55                 |                       | 0.80               | 0.68                 | 0.66                           | 0.35             | 0.33                        | 0.10                   | 0.59             |
| Education lockdown             | 0.59                 | 0.80                  |                    | 0.77                 | 0.70                           | 0.53             | 0.51                        | 0.26                   | 0.67             |
| Cancel public events           | 0.62                 | 0.68                  | 0.77               |                      | 0.83                           | 0.63             | 0.57                        | 0.29                   | 0.64             |
| Restrict gatherings >100 pers. | 0.48                 | 0.66                  | 0.70               | 0.83                 |                                | 0.53             | 0.56                        | 0.35                   | 0.68             |
| Close workplaces               | 0.56                 | 0.35                  | 0.53               | 0.63                 | 0.53                           |                  | 0.74                        | 0.35                   | 0.50             |
| Restrict internal movements    | 0.48                 | 0.33                  | 0.51               | 0.57                 | 0.56                           | 0.74             |                             | 0.54                   | 0.50             |
| Close public transport         | 0.08                 | 0.10                  | 0.26               | 0.29                 | 0.35                           | 0.35             | 0.54                        |                        | 0.17             |
| Home containment               | 0.47                 | 0.59                  | 0.67               | 0.64                 | 0.68                           | 0.50             | 0.50                        | 0.17                   |                  |

837

838

839

**Extended Data Figure 7. Pearson correlation between non-pharmaceutical interventions.**

840

Data derive from 14,829 sub-intervals, including 4,019 time-to-event sub-intervals and 10,810 censored sub-intervals. Sub-intervals result from splitting phylogenetic branches (n = 8,210) in which a change of intervention (activation or release) occurs. Smaller absolute correlations (white) favor the identifiability of intervention effects in multivariable analysis while larger absolute correlations (orange/red) can result into dependencies between model coefficients (see Fig. 3c).

841

842

843

844

845

846



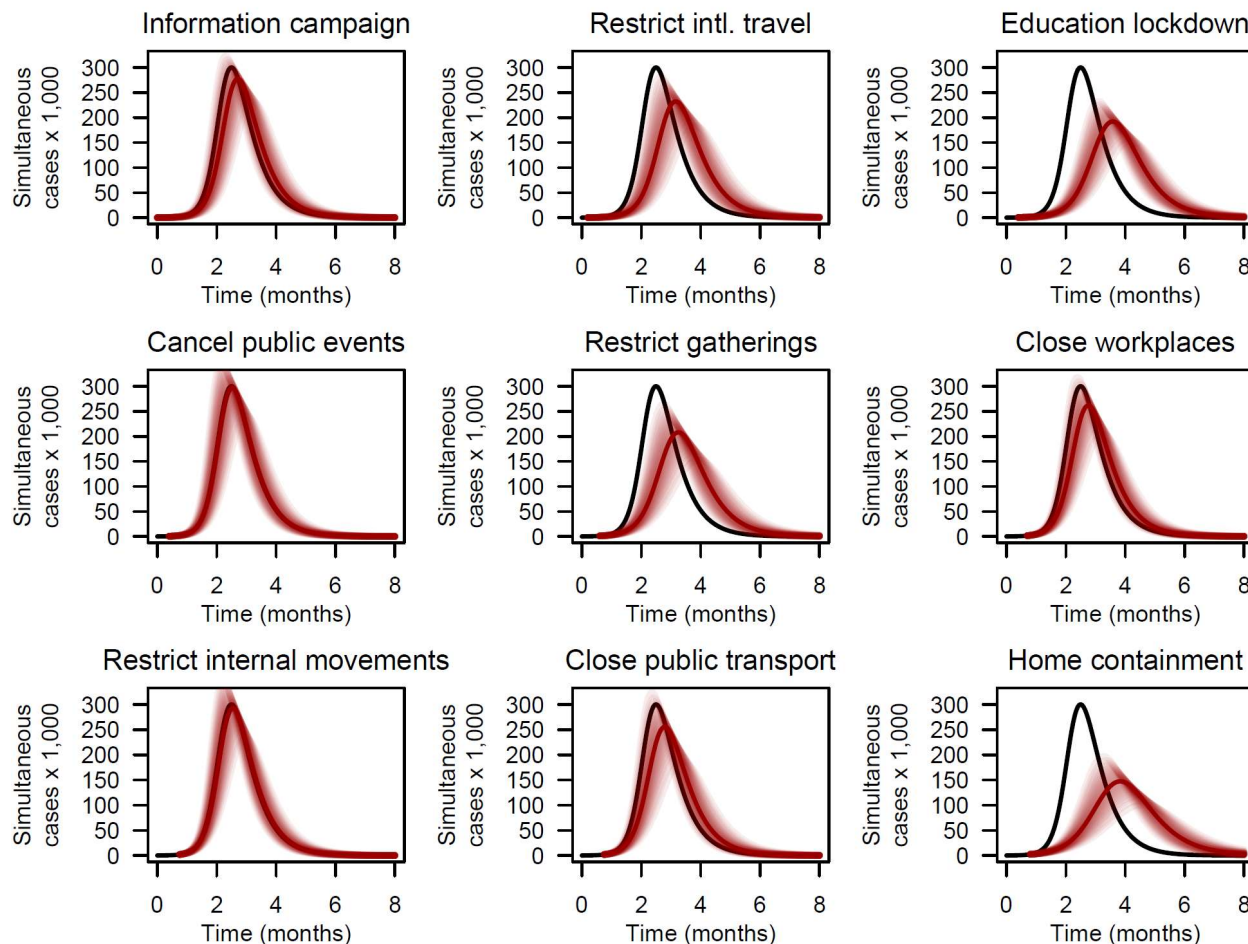

847

848

849

850

851

852

853

854

855

856

857

858

859

**Extended Data Figure 8. Predicted individual impact of 9 non-pharmaceutical interventions (NPIs) on the number of simultaneous COVID-19 cases in an idealized population of 1 million susceptible individuals.** Gray lines represent the case count predicted by an epidemiological SIR model with a basic reproduction number  $R_0 = 3$ , as estimated in the absence of NPIs, and a mean infectious period of 2 weeks. For each NPI, the simultaneous case count (red line) and 95% confidence band are derived from an SIR model in which the basic reproduction number is altered as predicted by the multivariate model coefficients shown in Fig. 3b. The delay between the 100<sup>th</sup> case and NPI implementation in SIR models coincides with the median delay between the 1<sup>st</sup> transmission event and the NPI implementation shown in Fig. 3a.

**Extended Data Table 1. Predicted percent change of COVID-19 effective reproduction number in response to non-pharmaceutical interventions with and without adjustment for time.** Data derive from multivariable mixed-effect Cox regression models including one random intercept per country and phylogenetic branch.

| Factor                         | Relative $R_t$ (% change) |                        |
|--------------------------------|---------------------------|------------------------|
|                                | Base model                | Time-adjusted model    |
| Elapsed time (per month)       | -                         | -31.4 (-38.9 to -22.9) |
| Information campaign           | -6.0 (-17.0 to 6.5)       | 3.2 (-9.6 to 17.8)     |
| Restrict intl. travel          | -16.9 (-27.5 to -4.8)     | -11.0 (-22.8 to 2.7)   |
| Education lockdown             | -25.6 (-33.4 to -16.9)    | -21.0 (-29.6 to -11.2) |
| Cancel public events           | -1.0 (-14.7 to 15.0)      | 1.1 (-13.5 to 18.0)    |
| Restrict gatherings >100 pers. | -22.3 (-33.4 to -9.3)     | -17.3 (-29.5 to -2.9)  |
| Close workplaces               | -10.0 (-22.8 to 5.0)      | -8.8 (-22.2 to 6.9)    |
| Restrict internal movements    | -2.2 (-16.8 to 15.0)      | 0.8 (-14.8 to 19.2)    |
| Close public transport         | -11.5 (-26.6 to 6.7)      | -9.7 (-25.6 to 9.5)    |
| Home containment               | -34.6 (-43.2 to -24.7)    | -35.4 (-44.0 to -25.4) |

860

861

**Extended Data Table 2. Predicted reduction of the COVID-19 effective reproduction number by non-pharmaceutical interventions implemented alone.**

| <b>Intervention</b>            | <b>Probability that <math>R_t &lt; 1</math> if <math>R_0 = 1.5</math></b> |
|--------------------------------|---------------------------------------------------------------------------|
| Information campaign           | <0.01                                                                     |
| Restrict intl. travel          | <0.01                                                                     |
| Education lockdown             | 0.03                                                                      |
| Cancel public events           | <0.01                                                                     |
| Restrict gatherings >100 pers. | 0.03                                                                      |
| Close workplaces               | <0.01                                                                     |
| Restrict internal movements    | <0.01                                                                     |
| Close public transport         | <0.01                                                                     |
| Home containment               | 0.61                                                                      |

NOTE. The probability that  $R_t < 1$  was less than 0.01 for all interventions if  $R_0 \geq 2$ .

862

863
