# Supplementary material for: A viral perspective on worldwide non-pharmaceutical interventions against COVID-19
Source: medRxiv preprint, doi:10.1101/2020.08.24.20180927, version 3 (2020-10-31)
Supplement: Extended Dataset 5 [file 180927_file04.xlsx]

## Sheet: Contributors
Extended Data Table 5. Authors and laboratories having contributed SARS-CoV-2 genomes included in the dated phylogeny.
Author	n (strains)	publication title	journal	publication URL	strains
Wang et al	66	unknown	unknown	unknown	Shanghai/SH0020/2020,Shanghai/SH0107/2020,Shanghai/SH0036/2020,Shanghai/SH0039/2020,Shanghai/SH0034/2020,Shanghai/SH0026/2020,Shanghai/SH0041/2020,Shanghai/SH0079/2020,Shanghai/SH0029/2020,Shanghai/SH0128/2020,Shanghai/SH0035/2020,Shanghai/SH0117/2020,Shanghai/SH0003/2020,Shanghai/SH0002/2020,Shanghai/SH0059/2020,Shanghai/SH0004/2020,Shanghai/SH0005/2020,Shanghai/SH0074/2020,Shanghai/SH0010/2020,…
Bayrakdar et al	57	unknown	unknown	unknown	Turkey/HSGM-6204/2020,Turkey/HSGM-1027/2020,Turkey/HSGM-5770/2020,Turkey/HSGM-439/2020,Turkey/HSGM-5516/2020,Turkey/HSGM-1458/2020,Turkey/HSGM-1495/2020,Turkey/HSGM-10232/2020,Turkey/HSGM-1490/2020,Turkey/HSGM-1492/2020,Turkey/HSGM-1497/2020,Turkey/HSGM-4598/2020,Turkey/HSGM-1476/2020,Turkey/HSGM-1009/2020,Turkey/HSGM-1481/2020,Turkey/HSGM-1468/2020,Turkey/HSGM-1444/2020,Turkey/HSGM-510/2020,Turk…
Yao et al	11	unknown	unknown	unknown	Hangzhou/ZJU-07/2020,Hangzhou/ZJU-02/2020,Hangzhou/ZJU-08/2020,Hangzhou/ZJU-09/2020,Hangzhou/ZJU-011/2020,Hangzhou/ZJU-06/2020,Hangzhou/ZJU-010/2020,Hangzhou/ZJU-04/2020,Hangzhou/ZJU-03/2020,Hangzhou/ZJU-05/2020,Hangzhou/ZJU-01/2020
Rodpan et al	23	unknown	unknown	unknown	Thailand/SI200615-NT/2020,Thailand/SI200468-NT/2020,Thailand/SI202620-NT/2020,Thailand/SI202872-NT/2020,Thailand/SI203285-NT/2020,Thailand/SI204713-NT/2020,Thailand/SI202769-NT/2020,Thailand/SI204514-NT/2020,Thailand/SI206377-NST/2020,Thailand/SI205457-NST/2020,Thailand/SI205929-NT/2020,Thailand/SI206917-NT/2020,Thailand/SI206587-NT/2020,Thailand/SI202205-NT/2020,Thailand/SI200893-NT/2020,Thailan…
Chen et al	37	unknown	unknown	unknown	Wuhan/WH01/2019,Wuhan/WH04/2020,HongKong/CUHK1/2020,Wuhan/WH03/2020,Wuhan/WHU02/2020,Wuhan/WHU01/2020,Zhejiang/WZ-01/2020,Wuhan/WH05/2020,USA/AK-PHL015/2020,USA/AK-PHL016/2020,USA/AK-PHL037/2020,USA/AK-PHL011/2020,USA/AK-PHL006/2020,USA/AK-PHL041/2020,USA/AK-PHL092/2020,USA/AK-PHL003/2020,USA/AK-PHL002/2020,USA/AK-PHL013/2020,USA/AK-PHL010/2020,USA/AK-PHL077/2020,USA/AK-PHL052/2020,USA/AK-PHL115/…
Deng et al	35	unknown	unknown	unknown	USA/CA-SCCPHD-UC109/2020,USA/CA-SCCPHD-UC140/2020,USA/CA-CDPH-UC30/2020,USA/CA-CDPH-UC7/2020,USA/CA-CDPH-UC9/2020,USA/CA-CDPH-UC8/2020,USA/CA-CDPH-UC1/2020,USA/CA-CDPH-UC6/2020,USA/CA-CDPH-UC5/2020,USA/CA-CDPH-UC2/2020,USA/CA-CDPH-UC4/2020,USA/CA-CDPH-UC3/2020,USA/CA-SCCPHD-UC169/2020,USA/CA-SCCPHD-UC108/2020,USA/CA-SCCPHD-UC102/2020,USA/CA-SCCPHD-UC116/2020,USA/CA-SCCPHD-UC105/2020,USA/CA-SCCPHD…
Liu et al	1	unknown	unknown	unknown	env/Wuhan/IVDC-HBF13/2020
Tan et al	10	unknown	unknown	unknown	Wuhan/IVDC-HB-05/2019,Wuhan/IVDC-HB-04/2020,Wuhan/IVDC-HB-GX02/2019,Yunnan/IVDC-YN-003/2020,Sichuan/IVDC-SC-001/2020,Wuhan/IVDC-HB-01/2019,Jiangsu/IVDC-JS-001/2020,Jiangxi/IVDC-JX-002/2020,Shandong/IVDC-SD-001/2020,Chongqing/IVDC-CQ-001/2020
Zhou et al	5	unknown	unknown	unknown	Wuhan/WIV07/2019,Wuhan/WIV02/2019,Wuhan/WIV05/2019,Wuhan/WIV04/2019,Wuhan/WIV06/2019
Li et al	141	unknown	unknown	unknown	Guangdong/20SF179/2020,Beijing/BJ625/2020,Beijing/BJ54/2020,Beijing/BJ53/2020,Beijing/BJ251/2020,Beijing/BJ252/2020,Nanchang/JX14/2020,Guangdong/20SF1107/2020,Nanchang/JX90/2020,Anhui/SZ005/2020,Beijing/BJ414/2020,Beijing/BJ287/2020,Beijing/BJ288/2020,Nanchang/JX177/2020,Beijing/BJ1112/2020,Beijing/233/2020,Beijing/BJ589/2020,Beijing/105/2020,Beijing/231/2020,Beijing/BJ390/2020,Beijing/235/2020,G…
Ren et al	4	unknown	unknown	unknown	Wuhan/IPBCAMS-WH-01/2019,Wuhan/IPBCAMS-WH-03/2019,Wuhan/IPBCAMS-WH-02/2019,Wuhan/IPBCAMS-WH-04/2019
Moore et al	81	unknown	unknown	unknown	Wales/PHWC-2B1DF/2020,Wales/PHWC-26FE9/2020,Wales/PHWC-2B2FA/2020,Wales/PHWC-29B88/2020,Wales/PHWC-27F06/2020,Wales/PHWC-24394/2020,Wales/PHWC-243A3/2020,Wales/PHWC-26C97/2020,Wales/PHWC-24B6F/2020,Wales/PHWC-23FEC/2020,Wales/PHWC-24983/2020,Wales/PHWC-24516/2020,Wales/PHWC-242B5/2020,Wales/PHWC-25E92/2020,Wales/PHWC-24B50/2020,Wales/PHWC-253DF/2020,Wales/PHWC-24473/2020,Wales/PHWC-23D00/2020,Wal…
Nieuwenhuijse et al	91	unknown	unknown	unknown	Netherlands/Oss_1363500/2020,Netherlands/Utrecht_17/2020,Netherlands/Utrecht_16/2020,Netherlands/NoordBrabant_47/2020,Netherlands/Limburg_4/2020,Netherlands/ZuidHolland_27/2020,Netherlands/Utrecht_12/2020,Netherlands/Limburg_6/2020,Netherlands/NoordBrabant_30/2020,Netherlands/Utrecht_19/2020,Netherlands/Hardinxveld_Giessendam_1364806/2020,Netherlands/NoordBrabant_32/2020,Netherlands/Naarden_13647…
Queen et al	35	unknown	unknown	unknown	USA/CA8/2020,USA/GA_1320/2020,USA/GA_1445/2020,USA/CA7/2020,USA/TX1/2020,USA/WA1/2020,USA/CA9/2020,USA/MN_0101/2020,USA/NV_0016/2020,USA/IL_1375/2020,USA/IL_1293/2020,USA/TX_2039/2020,Korea/BA-ACH_2719/2020,Korea/BA-ACH_2718/2020,Korea/BA-ACH_2604/2020,USA/OR_5430/2020,USA/CA3/2020,USA/CA4/2020,USA/RI_0556/2020,USA/GA_1299/2020,USA/FL_6318/2020,USA/PA_2887/2020,USA/IN_72003/2020,USA/IN_82003/2020…
Fang et al	9	unknown	unknown	unknown	Wuhan/HBCDC-HB-02/2019,Wuhan/HBCDC-HB-06/2020,Wuhan/HBCDC-HB-02/2020,Wuhan/HBCDC-HB-04/2020,Tianmen/HBCDC-HB-07/2020,Wuhan/HBCDC-HB-03/2020,Wuhan/HBCDC-HB-01/2019,Wuhan/HBCDC-HB-03/2019,Wuhan/HBCDC-HB-05/2020
Lu et al	29	unknown	unknown	unknown	Guangdong/2020XN4448-P0002/2020,Guangdong/GD2020139-P0007/2020,Guangdong/2020XN4273-P0036/2020,Guangdong/GZ-S6-P0050/2020,Guangdong/SZ-N128-P0057/2020,Guangdong/2020XN4291-P0038/2020,Guangdong/2020XN4276-P0037/2020,Guangdong/2020XN4475-P0042/2020,Guangdong/GD2020233-P0027/2020,Guangdong/2020XN4459-P0041/2020,Guangdong/FS-S30-P0052/2020,Guangdong/2020XN4373-P0039/2020,Guangdong/ZH-S33-P0058/2020,G…
Zhao et al et al	3	unknown	unknown	unknown	Guangzhou/GZMU0014/2020,Guangzhou/GZMU0042/2020,Guangzhou/GZMU0048/2020
Kim et al	25	unknown	unknown	unknown	SouthKorea/KCDC24/2020,Korea/KCDC2002/2020,SouthKorea/KCDC05/2020,Korea/KCDC2003/2020,Korea/KCDC2006/2020,SouthKorea/KCDC07/2020,Korea/KCDC2011/2020,Korea/KCDC2010/2020,Korea/KCDC2008/2020,Korea/KCDC2009/2020,SouthKorea/KCDC06/2020,SouthKorea/KCDC03/2020,Korea/KCDC2018/2020,Korea/KCDC2014/2020,Korea/KCDC2013/2020,Korea/KCDC2012/2020,Korea/KCDC2001/2020,Korea/KCDC2005/2020,Korea/KCDC2007/2020,Kore…
Fan et al	6	unknown	unknown	unknown	Beijing/Wuhan_IME-BJ07/2020,Beijing/Wuhan_IME-BJ04/2020,Beijing/Wuhan_IME-BJ03/2020,Beijing/Wuhan_IME-BJ02/2020,Beijing/Wuhan_IME-BJ01/2020,Beijing/Wuhan_IME-BJ05/2020
Kang et al	10	unknown	unknown	unknown	SouthKorea/KUMC06/2020,SouthKorea/KUMC04/2020,SouthKorea/KUMC03/2020,SouthKorea/KUMC05/2020,Guangdong/20SF025/2020,Guangdong/20SF012/2020,SouthKorea/KUMC01/2020,SouthKorea/KUMC02/2020,Foshan/20SF210/2020,Guangdong/20SF201/2020
Mohd Noor Mat Isa et al	6	unknown	unknown	unknown	Malaysia/MKAK-CL-2020-5096/2020,Malaysia/MKAK-CL-2020-6430/2020,Malaysia/MKAK-CL-2020-5045/2020,Malaysia/MKAK-CL-2020-5049/2020,Malaysia/MKAK-CL-2020-5047/2020,Malaysia/MKAK-CL-2020-7554/2020
Pilailuk et al	22	unknown	unknown	unknown	Thailand/NIH-2720/2020,Thailand/NIH-2492/2020,Thailand/NIH-2492-2/2020,Thailand/NIH-2980/2020,Thailand/NIH-2721/2020,Thailand/NIH-2420/2020,Thailand/NIH-2488/2020,Thailand/NIH-2472/2020,Thailand/NIH-2296/2020,Thailand/NIH-2489/2020,Thailand/NIH-363/2020,Thailand/NIH-190/2020,Thailand/NIH-15/2020,Thailand/61/2020,Thailand/NIH-162/2020,Thailand/NIH-59/2020,Thailand/74/2020,Thailand/NIH-2294/2020,Th…
Batty et al	26	unknown	unknown	unknown	Thailand/Bangkok-0035/2020,Thailand/Bangkok-0025/2020,Thailand/Bangkok-0040/2020,Thailand/Bangkok-0034/2020,Thailand/Bangkok-0029/2020,Thailand/Bangkok-0037/2020,Thailand/Bangkok-0041/2020,Thailand/Bangkok-0030/2020,Thailand/Bangkok-0019/2020,Thailand/Bangkok-0026/2020,Thailand/Bangkok-0028/2020,Thailand/Bangkok-0039/2020,Thailand/Bangkok-0043/2020,Thailand/Bangkok-0022/2020,Thailand/Bangkok-0036…
Iglesias-Caballero et al	21	unknown	unknown	unknown	Spain/PaisVasco201602/2020,Spain/CastillayLeon201437/2020,Spain/PaisVasco201493/2020,Spain/Canarias201495/2020,Spain/PaisVasco201607/2020,Spain/LaRioja201575/2020,Spain/PaisVasco201382/2020,Spain/CastillayLeon201323/2020,Spain/CastillayLeon201372/2020,Spain/CastillaLaMancha201328/2020,Spain/CastillaLaMancha201329/2020,Spain/Madrid201449/2020,Spain/Andalucia201617/2020,Spain/Andalucia201373/2020,S…
Ansari et al	3	unknown	unknown	unknown	Spain/Valencia67/2020,Spain/Valencia306/2020,Spain/Valencia255/2020
Beamud et al	5	unknown	unknown	unknown	Spain/Valencia28/2020,Spain/Valencia57/2020,Spain/Valencia239/2020,Spain/Valencia297/2020,Spain/Valencia199/2020
Marta Pla Diaz et al	4	unknown	unknown	unknown	Spain/Valencia30/2020,Spain/Valencia179/2020,Spain/Valencia312/2020,Spain/Valencia247/2020
Albert et al	121	unknown	unknown	unknown	France/GE1583/2020,France/IDF0373/2020,France/IDF0372/2020,France/IDF0626/2020,France/IDF0515/2020,France/B2334/2020,France/B2340/2020,France/CVL3365/2020,France/IDF3577/2020,France/IDF2561/2020,France/N1620/2020,France/N2223/2020,France/GE1973/2020,France/BFC2147/2020,France/BFC2094/2020,France/BFC2709/2020,France/HF1870/2020,France/GE3372/2020,France/CVL2000/2020,France/IDF3230/2020,France/IDF2…
Resende et al	18	unknown	unknown	unknown	Brazil/RJ-352/2020,Brazil/SC-766/2020,Brazil/ES-225/2020,Brazil/AL-837/2020,Brazil/RJ-818/2020,Brazil/RJ-872/2020,Brazil/RJ-763/2020,Brazil/DF-615i/2020,Brazil/DF-619i/2020,Brazil/DF-861/2020,Brazil/DF-891/2020,Brazil/DF-862/2020,Brazil/BA-510/2020,Brazil/BA-312/2020,Brazil/RJ-477/2020,Brazil/RJ-477i/2020,Brazil/RJ-314/2020,Brazil/SC-769/2020
Murtskhvaladze et al	4	unknown	unknown	unknown	Georgia/Tb-390/2020,Georgia/Tb-1523/2020,Georgia/Tb-273/2020,Georgia/Tb-673/2020
Nascimento et al	1	unknown	unknown	unknown	Brazil/AMBR-02/2020
Griselda De Marco et al	2	unknown	unknown	unknown	Spain/Valencia6/2020,Spain/Valencia218/2020
Neris Garcia-Gonzalez et al	6	unknown	unknown	unknown	Spain/Valencia300/2020,Spain/Valencia266/2020,Spain/Valencia293/2020,Spain/Valencia25/2020,Spain/Valencia262/2020,Spain/Valencia248/2020
Maria Dolores Ocete et al	3	unknown	unknown	unknown	Spain/Valencia116/2020,Spain/Valencia5/2020,Spain/Valencia80/2020
Vereecke et al	20	unknown	unknown	unknown	Belgium/UGent-48/2020,Belgium/UGent-10/2020,Belgium/UGent-3/2020,Belgium/UGent-19/2020,Belgium/UGent-20/2020,Belgium/UGent-21/2020,Belgium/UGent-9/2020,Belgium/UGent-47/2020,Belgium/UGent-4/2020,Belgium/UGent-8/2020,Belgium/UGent-44/2020,Belgium/UGent-46/2020,Belgium/UGent-43/2020,Belgium/UGent-12/2020,Belgium/UGent-13/2020,Belgium/UGent-45/2020,Belgium/UGent-49/2020,Belgium/UGent-39/2020,Belgium…
Viedma et al	13	unknown	unknown	unknown	Spain/Madrid_H12_4011/2020,Spain/Madrid_H12_2501/2020,Spain/Madrid_H12_3405/2020,Spain/Madrid_H12_1703/2020,Spain/Madrid_H12_3506/2020,Spain/Madrid_H12_1502/2020,Spain/Madrid_H12_3809/2020,Spain/Madrid_H12_3607/2020,Spain/Madrid_H12_3304/2020,Spain/Madrid_H12_1301/2020,Spain/Madrid_H12_3910/2020,Spain/Madrid_H12_2006/2020,Spain/Madrid_H12_3708/2020
Ana da Silva Filipe et al	37	unknown	unknown	unknown	Scotland/CVR173/2020,Scotland/CVR1133b/2020,Scotland/CVR937/2020,Scotland/CVR99/2020,Scotland/CVR1710/2020,Scotland/CVR804/2020,Scotland/CVR123/2020,Scotland/CVR169/2020,Scotland/CVR45/2020,Scotland/CVR46/2020,Scotland/CVR852/2020,Scotland/CVR864/2020,Scotland/CVR607/2020,Scotland/CVR903/2020,Scotland/CVR1635/2020,Scotland/CVR919/2020,Scotland/CVR1675/2020,Scotland/CVR211/2020,Scotland/CVR220/202…
Gray et al	4	unknown	unknown	unknown	Australia/NSW195/2020,Australia/NSW185/2020,Australia/NSW165/2020,Australia/NSW105/2020
Bowers et al	45	unknown	unknown	unknown	USA/AZ-TG271862/2020,USA/AZ-TG268282/2020,USA/AZ-TG271435/2020,USA/AZ-TG268893/2020,USA/AZ-TG268903/2020,USA/AZ-TG271864/2020,USA/AZ-TG268188/2020,USA/AZ-TG268350/2020,USA/AZ-TG271868/2020,USA/AZ-TG271866/2020,USA/AZ-TG268281/2020,USA/AZ-TG273280/2020,USA/AZ-TG271886/2020,USA/AZ-TG271890/2020,USA/AZ-TG271888/2020,USA/AZ-TG273304/2020,USA/AZ-TG273316/2020,USA/AZ-TG271894/2020,USA/AZ-TG273318/2020,…
Sim et al	3	unknown	unknown	unknown	Australia/NSW201/2020,Australia/NSW46/2020,Australia/NSW161/2020
Bachmann et al	6	unknown	unknown	unknown	Australia/NSW212/2020,Australia/NSW192/2020,Australia/NSW182/2020,Australia/NSW82/2020,Australia/NSW112/2020,Australia/NSW122/2020
Rockett et al	9	unknown	unknown	unknown	Australia/NSW193/2020,Australia/NSW183/2020,Australia/NSW02/2020,Australia/NSW10/2020,Australia/NSW08/2020,Australia/NSW15/2020,Australia/NSW09/2020,Australia/NSW113/2020,Australia/NSW123/2020
Meumann et al	15	unknown	unknown	unknown	Australia/NT08/2020,Australia/NT18/2020,Australia/NT02/2020,Australia/NT05/2020,Australia/NT04/2020,Australia/NT01/2020,Australia/NT14/2020,Australia/NT19/2020,Australia/NT11/2020,Australia/NT17/2020,Australia/NT16/2020,Australia/NT12/2020,Australia/NT13/2020,Australia/NT06/2020,Australia/NT10/2020
Arnott et al	6	unknown	unknown	unknown	Australia/NSW188/2020,Australia/NSW53/2020,Australia/NSW168/2020,Australia/NSW158/2020,Australia/NSW148/2020,Australia/NSW128/2020
Pyke et al	2	unknown	unknown	unknown	Australia/QLDID936/2020,Australia/QLDID935/2020
Caly et al	78	unknown	unknown	unknown	Australia/VIC1271/2020,Australia/VIC1103/2020,Australia/VIC584/2020,Australia/VIC415/2020,Australia/VIC367/2020,Australia/VIC1230/2020,Australia/VIC1079/2020,Australia/VIC77/2020,Australia/VIC28/2020,Australia/VIC330/2020,Australia/VIC07/2020,Australia/VIC999/2020,Australia/VIC13/2020,Australia/VIC138/2020,Australia/VIC721/2020,Australia/VIC1292/2020,Australia/VIC810/2020,Australia/VIC1221/2020,A…
Sadsad et al	2	unknown	unknown	unknown	Australia/NSW179/2020,Australia/NSW99/2020
Maria Alma Bracho et al	4	unknown	unknown	unknown	Spain/Valencia21/2020,Spain/Valencia4/2020,Spain/Valencia43/2020,Spain/Valencia217/2020
Guillermo Ruiz-Palacios et al	5	unknown	unknown	unknown	Mexico/CDMX-INCMNSZ_02/2020,Mexico/CDMX-INCMNSZ_01/2020,Mexico/CDMX-INCMNSZ_03/2020,Mexico/CDMX-INCMNSZ_04/2020,Mexico/CDMX-INCMNSZ_05/2020
Draper et al	4	unknown	unknown	unknown	Australia/NSW210/2020,Australia/NSW34/2020,Australia/NSW90/2020,Australia/NSW120/2020
Anke Wienecke-Baldacchino et al	81	unknown	unknown	unknown	Luxembourg/LNS6325758/2020,Luxembourg/LNS5488745/2020,Luxembourg/LNS4295690/2020,Luxembourg/LNS0744902/2020,Luxembourg/LNS0591129/2020,Luxembourg/LNS7841004/2020,Luxembourg/LNS0641910/2020,Luxembourg/LNS4780904/2020,Luxembourg/LNS3694003/2020,Luxembourg/LNS0000001/2020,Luxembourg/LNS1874423/2020,Luxembourg/LNS0814536/2020,Luxembourg/LNS7640155/2020,Luxembourg/LNS7357097/2020,Luxembourg/LNS3652733…
Dahdouh et al	15	unknown	unknown	unknown	Spain/Madrid_LP20_2327/2020,Spain/Madrid_R2_15/2020,Spain/Madrid_LP11_2271/2020,Spain/Madrid_LP22_5885/2020,Spain/Madrid_LP19_4952/2020,Spain/Madrid_LP10_12/2020,Spain/Madrid_H8_37/2020,Spain/Madrid_H10_39/2020,Spain/Madrid_LP15_4/2020,Spain/Madrid_LP30_2226/2020,Spain/Madrid_H5_34/2020,Spain/Madrid_LP24_5999/2020,Spain/Madrid_H3_10/2020,Spain/Madrid_LP28_2522/2020,Spain/Madrid_LP12_21/2020
Giuseppe D'Auria et al	1	unknown	unknown	unknown	Spain/Valencia23/2020
Medina et al	3	unknown	unknown	unknown	Chile/Santiago_op2d1/2020,Chile/Santiago_op3d1/2020,Chile/Santiago_op4d1/2020
Lidia Ruiz Roldan et al	3	unknown	unknown	unknown	Spain/Valencia240/2020,Spain/Valencia119/2020,Spain/Valencia220/2020
Loreto Ferrus Abad et al	3	unknown	unknown	unknown	Spain/Valencia251/2020,Spain/Valencia130/2020,Spain/Valencia137/2020
Bampali et al	4	unknown	unknown	unknown	Greece/16/2020,Greece/13/2020,Greece/12/2020,Greece/10/2020
Kassela et al	32	unknown	unknown	unknown	Greece/48/2020,Greece/145/2020,Greece/149/2020,Greece/134/2020,Greece/150/2020,Greece/47/2020,Greece/35/2020,Greece/53/2020,Greece/146/2020,Greece/144/2020,Greece/38/2020,Greece/140/2020,Greece/51/2020,Greece/141/2020,Greece/154/2020,Greece/136/2020,Greece/137/2020,Greece/151/2020,Greece/39/2020,Greece/135/2020,Greece/138/2020,Greece/36/2020,Greece/148/2020,Greece/139/2020,Greece/142/2020,Greece/…
Romero et al	11	unknown	unknown	unknown	Brazil/RJ0113/2020,Brazil/MG0102/2020,Brazil/GO0106/2020,Brazil/MG0101/2020,Brazil/RJ0116/2020,Brazil/RS0107/2020,Brazil/MG0112/2020,Brazil/SP0105/2020,Brazil/SP0104/2020,Brazil/MG0108/2020,Brazil/RJ0118/2020
Dia et al	22	unknown	unknown	unknown	Senegal/136/2020,Senegal/620/2020,Senegal/618/2020,Senegal/306/2020,Senegal/119/2020,Senegal/094/2020,Senegal/087/2020,Senegal/082/2020,Senegal/102/2020,Senegal/073/2020,Senegal/600/2020,Senegal/315/2020,Senegal/328/2020,Senegal/139/2020,Senegal/382/2020,Senegal/611/2020,Senegal/370/2020,Senegal/640/2020,Senegal/026/2020,Senegal/003/2020,Senegal/016/2020,Senegal/020/2020
Castillo et al	4	unknown	unknown	unknown	Chile/Santiago-1/2020,Chile/Talca-1/2020,Chile/Talca-2/2020,Chile/Santiago-2/2020
Navarro et al	3	unknown	unknown	unknown	Spain/Valencia54/2020,Spain/Valencia52/2020,Spain/Valencia49/2020
Shevtsov et al	4	unknown	unknown	unknown	Kazakhstan/NCB-5/2020,Kazakhstan/NCB-1/2020,Kazakhstan/NCB-3/2020,Kazakhstan/NCB-2/2020
Paula Ruiz-Hueso et al	2	unknown	unknown	unknown	Spain/Valencia34/2020,Spain/Valencia303/2020
Kujawa et al	1	unknown	unknown	unknown	Poland/Wro-02/2020
Bas Oude Munnink et al	128	unknown	unknown	unknown	Netherlands/Limburg_9/2020,Netherlands/Gelderland_11/2020,Netherlands/NA_166/2020,Netherlands/Flevoland_2/2020,Netherlands/ZuidHolland_32/2020,Netherlands/NA_155/2020,Netherlands/NoordBrabant_92/2020,Netherlands/NA_112/2020,Netherlands/NoordBrabant_79/2020,Netherlands/NoordBrabant_97/2020,Netherlands/Gelderland_10/2020,Netherlands/NoordBrabant_95/2020,Netherlands/NA_313/2020,Netherlands/Gelderlan…
Kumar et al	55	unknown	unknown	unknown	India/NCDC-02415/2020,India/GBRC13/2020,India/NCDC-01501/2020,India/NCDC-02370/2020,India/NCDC-01614/2020,India/NCDC-01441/2020,India/NCDC-01444/2020,India/NCDC-01604/2020,India/NCDC-01616/2020,India/NCDC-01760/2020,India/NCDC-02318/2020,India/NCDC-02315/2020,India/NCDC-02311/2020,India/NCDC-02309/2020,India/NCDC-02310/2020,India/NCDC-02331/2020,India/NCDC-02333/2020,India/NCDC-02323/2020,India/N…
Pramod Kumar# et al	50	unknown	unknown	unknown	India/NCDC-3279/2020,India/NCDC-3950/2020,India/NCDC-3176/2020,India/NCDC-3965/2020,India/NCDC-3961/2020,India/NCDC-4189/2020,India/NCDC-2519/2020,India/NCDC-3934/2020,India/NCDC-3985/2020,India/NCDC-3162/2020,India/NCDC-2514/2020,India/NCDC-3195/2020,India/NCDC-3170/2020,India/NCDC-3230/2020,India/NCDC-3982/2020,India/NCDC-3394/2020,India/NCDC-4208/2020,India/NCDC-2507/2020,India/NCDC-2517/2020,…
Storey et al	5	unknown	unknown	unknown	NewZealand/20VR0276/2020,NewZealand/20VR0206/2020,NewZealand/01/2020,NewZealand/20VR0189/2020,NewZealand/20VR019/2020
Uehara et al	8	unknown	unknown	unknown	USA/CA1/2020,USA/GA_2070/2020,USA/HI_7881/2020,USA/CA2/2020,USA/TX_2020/2020,USA/HI_4970/2020,USA/FL_5091/2020,USA/FL_5125/2020
Le Quynh Mai et al	5	unknown	unknown	unknown	Vietnam/CM99/2020,Vietnam/38142/2020,Vietnam/39607/2020,Vietnam/CM295/2020,Vietnam/CM296/2020
Chan et al	2	unknown	unknown	unknown	HongKong/HKU-001a/2020,Shenzhen/HKU-SZ-002/2020
Dominic N.C. Tsang et al	6	unknown	unknown	unknown	HongKong/VM20001061/2020,HongKong/VM20002493/2020,HongKong/VB20024950/2020,HongKong/VM20002582/2020,HongKong/VM20002868/2020,HongKong/VM20002849/2020
Ung Thi Hong Trang et al	1	unknown	unknown	unknown	Vietnam/VR03-38142/2020
Tao et al	42	unknown	unknown	unknown	USA/SC_3571/2020,USA/SC_3570/2020,USA/SC_3520/2020,USA/VA_6171/2020,USA/AZ1/2020,USA/CA5/2020,USA/IL1/2020,USA/CA_2602/2020,USA/WA_5030/2020,USA/OR_2656/2020,USA/GA_2741/2020,USA/MA_1355/2020,USA/NY-SURV0166/2020,USA/RI_0520/2020,USA/GA_2742/2020,USA/IA_6395/2020,USA/IA_6391/2020,USA/IA_6396/2020,USA/IA_6401/2020,USA/IA_6399/2020,USA/IA_6390/2020,USA/SC_3572/2020,USA/NY-SURV0710/2020,USA/NY-SURV0…
Schmedes et al	40	unknown	unknown	unknown	USA/FL-BPHL-012/2020,USA/FL-BPHL-055/2020,USA/FL-BPHL-058/2020,USA/FL-BPHL-059/2020,USA/FL-BPHL-06/2020,USA/FL-BPHL-04/2020,USA/FL-BPHL-027/2020,USA/FL-BPHL-09/2020,USA/FL-BPHL-042/2020,USA/FL-BPHL-040/2020,USA/FL-BPHL-018/2020,USA/FL-BPHL-01/2020,USA/FL-BPHL-020/2020,USA/FL-BPHL-046/2020,USA/FL-BPHL-017/2020,USA/FL-BPHL-047/2020,USA/FL-BPHL-048/2020,USA/FL-BPHL-08/2020,USA/FL-BPHL-02/2020,USA/FL…
Blankenship et al	40	unknown	unknown	unknown	USA/MI-MDHHS-SC20035/2020,USA/MI-MDHHS-SC20042/2020,USA/MI-SC2-04/2020,USA/MI-MDHHS-SC20186/2020,USA/MI-SC2-02/2020,USA/MI-MDHHS-SC20113/2020,USA/MI-MDHHS-SC20076/2020,USA/MI-MDHHS-SC20128/2020,USA/MI-MDHHS-SC20108/2020,USA/MI-SC2-01/2020,USA/MI-MDHHS-SC20078/2020,USA/MI-MDHHS-SC20172/2020,USA/MI-MDHHS-SC20026/2020,USA/MI-MDHHS-SC20027/2020,USA/MI-MDHHS-SC20152/2020,USA/MI-MDHHS-SC20143/2020,USA/…
Shankar et al	1	unknown	unknown	unknown	env/USA/FL-UF3/2020
Holzer et al	6	unknown	unknown	unknown	USA/IN-Lilly-IPB0170-14bc04/2020,USA/IN-Lilly-IPB0170-16bc18/2020,USA/IN-Lilly-IPB0170-4bc21/2020,USA/IN-Lilly-IPB0170-15bc11/2020,USA/IN-Lilly-IPB0170-15bc12/2020,USA/IN-Lilly-IPB0170-4bc20/2020
Gage Moreno and Katarina Braun et al	14	unknown	unknown	unknown	USA/WI-166/2020,USA/WI-206/2020,USA/WI-247/2020,USA/WI-237/2020,USA/WI-236/2020,USA/WI-196/2020,USA/WI-185/2020,USA/WI-241/2020,USA/WI-219/2020,USA/WI-186/2020,USA/WI-248/2020,USA/WI-204/2020,USA/WI-188/2020,USA/WI-239/2020
Plumb et al	57	unknown	unknown	unknown	USA/MN-MDH-470/2020,USA/MN3-MDH3/2020,USA/MN134-MDH134/2020,USA/MN-MDH-284/2020,USA/MN-MDH-336/2020,USA/MN-MDH-374/2020,USA/MN-MDH-436/2020,USA/MN56-MDH56/2020,USA/MN-MDH-666/2020,USA/MN131-MDH131/2020,USA/MN-MDH-141/2020,USA/MN42-MDH42/2020,USA/MN53-MDH53/2020,USA/MN-MDH-387/2020,USA/MN-MDH-472/2020,USA/MN68-MDH68/2020,USA/MN5-MDH5/2020,USA/MN69-MDH69/2020,USA/MN62-MDH62/2020,USA/MN128-MDH128/20…
Wellington SCL et al	1	unknown	unknown	unknown	NewZealand/20VR0275/2020
S. Wesley Long et al	79	unknown	unknown	unknown	USA/TX-HMH0395/2020,USA/TX-HMH0423/2020,USA/TX-HMH0379/2020,USA/TX-HMH068/2020,USA/TX-HMH022/2020,USA/TX-HMH0150/2020,USA/TX-HMH0428/2020,USA/TX-HMH0263/2020,USA/TX-HMH0430/2020,USA/TX-HMH0446/2020,USA/TX-HMH0400/2020,USA/TX-HMH0432/2020,USA/TX-HMH0450/2020,USA/TX-HMH079/2020,USA/TX-HMH0435/2020,USA/TX-HMH0441/2020,USA/TX-HMH029/2020,USA/TX-HMH0378/2020,USA/TX-HMH0146/2020,USA/TX-HMH04/2020,USA/T…
Tu et al	5	unknown	unknown	unknown	USA/OH-OSUP0016/2020,USA/OH-OSUP0109/2020,USA/OH-OSUP0024/2020,USA/OH-OSUP0017/2020,USA/OH-OSUP0112/2020
Division of Consolidated Laboratories et al	60	unknown	unknown	unknown	USA/VA-DCLS-097/2020,USA/VA-DCLS-098/2020,USA/VA-DCLS-070/2020,USA/VA-DCLS-071/2020,USA/VA-DCLS-051/2020,USA/VA-DCLS-045/2020,USA/VA-DCLS-0114/2020,USA/VA-DCLS-0146/2020,USA/VA-DCLS-0138/2020,USA/VA-DCLS-0134/2020,USA/VA-DCLS-0140/2020,USA/VA-DCLS-0141/2020,USA/VA-DCLS-0136/2020,USA/VA-DCLS-0144/2020,USA/VA-DCLS-0215/2020,USA/VA-DCLS-0142/2020,USA/VA-DCLS-0162/2020,USA/VA-DCLS-061/2020,USA/VA-DCL…
Thielen et al	15	unknown	unknown	unknown	USA/MD-HP030/2020,USA/MD-HP022/2020,USA/MD-HP020/2020,USA/MD-HP044/2020,USA/MD-HP010/2020,USA/MD-HP024/2020,USA/MD-HP06/2020,USA/MD-HP07/2020,USA/MD-HP038/2020,USA/MD-HP036/2020,USA/MD-HP037/2020,USA/MD-HP016/2020,USA/MD-HP015/2020,USA/MD-HP023/2020,USA/MD-HP043/2020
Moreno et al	60	unknown	unknown	unknown	USA/WI-143/2020,USA/WI-61/2020,USA/WI-117/2020,USA/WI-96/2020,USA/WI-146/2020,USA/WI-88/2020,USA/WI-70/2020,USA/WI-66/2020,USA/WI-67/2020,USA/WI-UW-293/2020,USA/WI-UW-290/2020,USA/WI-UW-297/2020,USA/WI-UW-279/2020,USA/WI-UW-301/2020,USA/WI-UW-286/2020,USA/WI-UW-315/2020,USA/WI-UW-342/2020,USA/WI-UW-346/2020,USA/WI-UW-326/2020,USA/WI-UW-343/2020,USA/WI-256/2020,USA/WI-UW-318/2020,USA/WI-114/2020,U…
Yeh et al	19	unknown	unknown	unknown	Taiwan/NTU13/2020,Taiwan/NTU01/2020,Taiwan/NTU07/2020,Taiwan/NTU02/2020,Taiwan/NTU11/2020,Taiwan/NTU04/2020,Taiwan/NTU06/2020,Taiwan/NTU16/2020,Taiwan/NTU14/2020,Taiwan/NTU21/2020,Taiwan/NTU19/2020,Taiwan/NTU15/2020,Taiwan/NTU12/2020,Taiwan/NTU03/2020,Taiwan/NTU08/2020,Taiwan/NTU05/2020,Taiwan/NTU17/2020,Taiwan/NTU20/2020,Taiwan/NTU09/2020
Mfarrej et al	17	unknown	unknown	unknown	SaudiArabia/KAUST-Madinah57/2020,SaudiArabia/KAUST-Madinah27/2020,SaudiArabia/KAUST-Jeddah60/2020,SaudiArabia/KAUST-Madinah51/2020,SaudiArabia/KAUST-Makkah19/2020,SaudiArabia/KAUST-Jeddah59/2020,SaudiArabia/KAUST-Madinah24/2020,SaudiArabia/KAUST-Madinah23/2020,SaudiArabia/KAUST-Madinah50/2020,SaudiArabia/KAUST-Madinah48/2020,SaudiArabia/KAUST-Madinah55/2020,SaudiArabia/KAUST-Madinah30/2020,SaudiA…
Qi et al	11	unknown	unknown	unknown	Fujian/3520022Y/2020,Fujian/IM3520016T/2020,Fujian/IM3520017T/2020,Fujian/IM3520004T/2020,Fujian/IM3520002T/2020,Fujian/IM3520003T/2020,Fujian/IM3520008T/2020,Fujian/IM3520014T/2020,Fujian/IM3520013T/2020,Fujian/IM3520001T/2020,Fujian/IM3520010T/2020
Huang et al	17	unknown	unknown	unknown	Australia/QLD02/2020,Australia/QLD03/2020,Australia/QLD04/2020,Australia/QLD01/2020,Australia/QLDID919/2020,Australia/QLDID931/2020,Australia/QLDID922/2020,Australia/QLDID928/2020,Australia/QLD09/2020,Australia/QLDID921/2020,Australia/QLDID929/2020,Australia/QLDID926/2020,Australia/QLDID924/2020,Australia/QLDID920/2020,Australia/QLDID923/2020,Australia/QLDID927/2020,Australia/QLDID925/2020
Anderson et al	18	unknown	unknown	unknown	Singapore/4/2020,Singapore/12/2020,Singapore/30/2020,Singapore/5/2020,Singapore/2/2020,Singapore/6/2020,Singapore/34/2020,Singapore/13/2020,Singapore/14/2020,Singapore/23/2020,Singapore/22/2020,Singapore/25/2020,Singapore/29/2020,Singapore/26/2020,Singapore/24/2020,Singapore/33/2020,Singapore/3/2020,Singapore/27/2020
Katarina Braun and Gage Moreno et al	3	unknown	unknown	unknown	USA/WI-07/2020,USA/WI-09/2020,USA/WI-10/2020
Verma et al	1	unknown	unknown	unknown	India/GBRC11/2020
Placide Mbala-Kingebeni et al	75	unknown	unknown	unknown	DRC/300/2020,DRC/299/2020,DRC/158/2020,DRC/KN-0059/2020,DRC/1779/2020,DRC/2813/2020,DRC/215/2020,DRC/1378/2020,DRC/2047/2020,DRC/1382/2020,DRC/1398/2020,DRC/523/2020,DRC/241/2020,DRC/236/2020,DRC/KN-0038/2020,DRC/108/2020,DRC/191/2020,DRC/1319/2020,DRC/431/2020,DRC/1326/2020,DRC/94/2020,DRC/214/2020,DRC/376/2020,DRC/397/2020,DRC/396/2020,DRC/KN-0054/2020,DRC/KN-0070/2020,DRC/KN-0043/2020,DRC/80/2…
Ana Gonzalez-Reiche et al	18	unknown	unknown	unknown	USA/NY-PV08148/2020,USA/NY-PV09063/2020,USA/NY-PV09154/2020,USA/NY-PV08489/2020,USA/NY-PV09071/2020,USA/NY-PV09057/2020,USA/NY-PV08404/2020,USA/NJ-PV09072/2020,USA/NY-PV09180/2020,USA/NY-PV09138/2020,USA/NY-PV09046/2020,USA/NY-PV09028/2020,USA/NY-PV09083/2020,USA/NY-PV08109/2020,USA/NY-PV09043/2020,USA/NY-PV09056/2020,USA/NY-PV08455/2020,USA/NY-PV09170/2020
Roychoudhury et al	187	unknown	unknown	unknown	USA/CT-UW303/2020,USA/WA-UW-3992/2020,USA/UN-UW-5368/2020,USA/WA-UW-1946/2020,USA/WA-UW162/2020,USA/UN-UW219/2020,USA/WA-UW141/2020,USA/UN-UW-4645/2020,USA/OR-UW-1937/2020,USA/MN-UW334/2020,USA/IL-UW381/2020,USA/WA-UW214/2020,USA/UN-UW-547/2020,USA/WA-UW182/2020,USA/WA-UW-6484/2020,USA/UN-UW382/2020,USA/UN-UW-1403/2020,USA/UN-UW-1402/2020,USA/OR-UW-1849/2020,USA/WA-UW-6488/2020,USA/IL-UW-1265/202…
Fauver et al	66	unknown	unknown	unknown	USA/CT-Yale-102/2020,USA/CT-Yale-088/2020,USA/CT-Yale-007/2020,USA/CT-Yale-041/2020,USA/CT-Yale-009/2020,USA/CT-Yale-002/2020,USA/CT-Yale-057/2020,USA/CT-Yale-042/2020,USA/CT-Yale-045/2020,USA/CT-Yale-032/2020,USA/CT-Yale-034/2020,USA/CT-Yale-012/2020,USA/CT-Yale-112/2020,USA/CT-Yale-114/2020,USA/CT-Yale-028/2020,USA/CT-Yale-141/2020,USA/CT-Yale-127/2020,USA/CT-Yale-079/2020,USA/CT-Yale-040/2020,…
Ngoi et al	14	unknown	unknown	unknown	Ghana/2828_S6/2020,Ghana/1651_S3/2020,Ghana/2850_S15/2020,Ghana/3177_S12/2020,Ghana/3176_S11/2020,Ghana/2230_S4/2020,Ghana/1565_S13/2020,Ghana/2914_S8/2020,Ghana/2944_S9/2020,Ghana/2853_S7/2020,Ghana/1659_S14/2020,Ghana/2986_S10/2020,Ghana/1622_S2/2020,Ghana/2333_S5/2020
Hala et al	88	unknown	unknown	unknown	SaudiArabia/KAUST-MAKKAH90/2020,SaudiArabia/KAUST-Makkah18/2020,SaudiArabia/KAUST-Makkah12/2020,SaudiArabia/KAUST-MAKKAH166/2020,SaudiArabia/KAUST-MAKKAH229/2020,SaudiArabia/KAUST-Makkah13/2020,SaudiArabia/KAUST-Makkah06/2020,SaudiArabia/KAUST-Makkah05/2020,SaudiArabia/KAUST-Jeddah64/2020,SaudiArabia/KAUST-Makkah04/2020,SaudiArabia/KAUST-Makkah03/2020,SaudiArabia/KAUST-MAKKAH188/2020,SaudiArabia/…
Division of Consolidated Laboratory Services et al	13	unknown	unknown	unknown	USA/VA-DCLS-021/2020,USA/VA-DCLS-010/2020,USA/VA-DCLS-024/2020,USA/VA-DCLS-017/2020,USA/VA-DCLS-043/2020,USA/VA-DCLS-044/2020,USA/VA-DCLS-016/2020,USA/VA-DCLS-09/2020,USA/VA-DCLS-038/2020,USA/VA-DCLS-07/2020,USA/VA-DCLS-034/2020,USA/VA-DCLS-031/2020,USA/VA-DCLS-014/2020
Saiyed et al	1	unknown	unknown	unknown	India/GBRC15/2020
Bodnev et al	29	unknown	unknown	unknown	Russia/Kabardino-Balkaria-80503/2020,Russia/StPetersburg-82005/2020,Russia/Omsk-89001/2020,Russia/Yakutia-73709/2020,Russia/Moscow-67142/2020,Russia/Moscow-71605/2020,Russia/Sverdlovsk-86704/2020,Russia/Perm-82707/2020,Russia/Novosibirsk-84101/2020,Russia/Vector_84801/2020,Russia/Buryatia-87106/2020,Russia/Buryatia-87105/2020,Russia/Tatarstan-82208/2020,Russia/Primorskiy-79001/2020,Russia/Moscow-…
Pyankov et al	36	unknown	unknown	unknown	Russia/Kabardino-Balkaria-80501/2020,Russia/StPetersburg-73603/2020,Russia/Moscow-77627/2020,Russia/Pskov-83602/2020,Russia/Sverdlovsk-82904/2020,Russia/Moscow-62502/2020,Russia/Moscow-62508/2020,Russia/Moscow-67609/2020,Russia/Samara-73403/2020,Russia/Moscow-77620/2020,Russia/Moscow-77610/2020,Russia/Yakutia-83301/2020,Russia/Khabarovsk-88201/2020,Russia/Lipetsk-62704/2020,Russia/Lipetsk-62707/2…
Eden et al	6	unknown	unknown	unknown	Australia/NSW04/2020,Australia/NSW01/2020,Australia/NSW03/2020,Australia/NSW07/2020,Australia/NSW05/2020,Australia/NSW06/2020
et al	17	unknown	unknown	unknown	Guangzhou/GZMU0049/2020,Guangzhou/GZMU0023/2020,Guangzhou/GZMU0025/2020,Guangzhou/GZMU0039/2020,Guangzhou/GZMU0056/2020,Guangzhou/GZMU0045/2020,Guangzhou/GZMU0041/2020,Guangzhou/GZMU0059/2020,Guangzhou/GZMU0003/2020,Guangzhou/GZMU0035/2020,Guangzhou/GZMU0054/2020,Guangzhou/GZMU0010/2020,Guangzhou/GZMU0009/2020,Guangzhou/GZMU0033/2020,Guangzhou/GZMU0034/2020,Guangzhou/GZMU0037/2020,Guangzhou/GZMU0…
Sekizuka et al	24	unknown	unknown	unknown	Japan/TY-WK-501/2020,Japan/TY-WK-521/2020,Japan/TY-WK-012/2020,Japan/KY-V-029/2020,Japan/AI-I-004/2020,Japan/NA-20-05-1/2020,Japan/OS-20-07-1/2020,Japan/TK-20-31-3/2020,Japan/P5-2/2020,Japan/P4-4/2020,Japan/P4-8/2020,Japan/P4-6/2020,Japan/P4-7/2020,Japan/P4-1/2020,Japan/P5-3/2020,Japan/P4-3/2020,Japan/P4-2/2020,Japan/P5-1/2020,Japan/P4-5/2020,Japan/P3-1/2020,Japan/P3-2/2020,Japan/P1/2020,Japan/P2…
Braun et al	1	unknown	unknown	unknown	Japan/UT-NCGM02/2020
Yang et al	18	unknown	unknown	unknown	Shenzhen/SZTH-002/2020,Taiwan/3/2020,Taiwan/2/2020,Taiwan/8/2020,Taiwan/5/2020,Taiwan/4/2020,Taiwan/284/2020,Taiwan/299/2020,Shenzhen/SZTH-003/2020,Taiwan/225/2020,Taiwan/78/2020,Taiwan/58/2020,Taiwan/144/2020,Taiwan/125/2020,Taiwan/128/2020,Taiwan/170/2020,Taiwan/107/2020,Taiwan/108/2020
Ahmad Abou Tayoun et al	25	unknown	unknown	unknown	UnitedArabEmirates/L5630/2020,UnitedArabEmirates/L4280/2020,UnitedArabEmirates/L6599/2020,UnitedArabEmirates/L9766/2020,UnitedArabEmirates/L4184/2020,UnitedArabEmirates/L1014/2020,UnitedArabEmirates/L4682/2020,UnitedArabEmirates/L0904/2020,UnitedArabEmirates/L0184/2020,UnitedArabEmirates/L2409/2020,UnitedArabEmirates/L6627/2020,UnitedArabEmirates/L0231/2020,UnitedArabEmirates/L068/2020,UnitedArab…
Jiang et al	5	unknown	unknown	unknown	Shandong/LY003/2020,Shandong/LY005/2020,Shandong/LY006/2020,Shandong/LY004/2020,Shandong/LY008/2020
Potdar et al	2	unknown	unknown	unknown	India/1-31/2020,India/1-27/2020
To et al	8	unknown	unknown	unknown	HongKong/HKU-907a/2020,HongKong/HKU-907b/2020,HongKong/HKU-902b/2020,HongKong/HKU-902a/2020,HongKong/HKU-903a/2020,HongKong/HKU-903b/2020,HongKong/HKU-908a/2020,HongKong/HKU-908b/2020
Galiano et al	66	unknown	unknown	unknown	England/01/2020,England/02/2020,England/20132079304/2020,England/20148002104/2020,England/20136088602/2020,England/200690756/2020,England/200690245/2020,England/200641094/2020,England/200690300/2020,England/200690306/2020,England/20129080204/2020,England/20128038304/2020,England/200990002/2020,England/200960041/2020,England/201360003/2020,England/20102000106/2020,England/200960515/2020,England/20…
Maitra et al	8	unknown	unknown	unknown	India/S10/2020,India/S3/2020,India/S2/2020,India/S5/2020,India/S12/2020,India/S11/2020,India/S6/2020,India/S8/2020
Mak et al	48	unknown	unknown	unknown	Singapore/19/2020,Singapore/12Clin/2020,Singapore/43/2020,Singapore/14Clin/2020,Singapore/18/2020,Singapore/20/2020,Singapore/48/2020,Singapore/17/2020,Singapore/1/2020,Singapore/36/2020,Singapore/15/2020,Singapore/16/2020,Singapore/21/2020,Singapore/51/2020,Singapore/35/2020,Singapore/50/2020,Singapore/44/2020,Singapore/3Clin/2020,Singapore/47/2020,Singapore/55/2020,Singapore/40/2020,Singapore/4…
Xiaoguang et al	4	unknown	unknown	unknown	Lishui/LS559/2020,Lishui/LS557/2020,Lishui/LS111/2020,Lishui/LS556/2020
Vanmechelen et al	35	unknown	unknown	unknown	Belgium/GHB-03021/2020,Belgium/Human/CS-031052/2020,Belgium/CG-030158/2020,Belgium/VPE-030650/2020,Belgium/HAA-030953/2020,Belgium/SN-03031/2020,Belgium/BM-03012/2020,Belgium/VAG-03013/2020,Belgium/VLM-03011/2020,Belgium/RS-030257/2020,Belgium/BG-030955/2020,Belgium/DBD-03024/2020,Belgium/QKJ-03015/2020,Belgium/UMF-03025/2020,Belgium/VS-030542/2020,Belgium/DBA-03032/2020,Belgium/JRH-030459/2020,B…
Issa Abu-Dayyeh et al	24	unknown	unknown	unknown	Jordan/SR-039/2020,Jordan/SR-051/2020,Jordan/SR-057/2020,Jordan/SR-056/2020,Jordan/SR-037/2020,Jordan/SR-084/2020,Jordan/SR-053/2020,Jordan/SR-042/2020,Jordan/SR-035/2020,Jordan/SR-043/2020,Jordan/SR-033/2020,Jordan/SR-044/2020,Jordan/SR-046/2020,Jordan/SR-055/2020,Jordan/SR-041/2020,Jordan/SR-034/2020,Jordan/SR-054/2020,Jordan/SR-049/2020,Jordan/SR-052/2020,Jordan/SR-045/2020,Jordan/SR-047/2020,…
Gonzalez et al	6	unknown	unknown	unknown	Spain/Madrid_H12_13/2020,Spain/Madrid_H12_26/2020,Spain/Madrid_H12_21/2020,Spain/Madrid_H12_20/2020,Spain/Madrid_H12_30/2020,Spain/Madrid_H12_25/2020
Juan Alberola Enguidanos et al	8	unknown	unknown	unknown	Spain/Valencia278/2020,Spain/Valencia153/2020,Spain/Valencia141/2020,Spain/Valencia144/2020,Spain/Valencia151/2020,Spain/Valencia167/2020,Spain/Valencia147/2020,Spain/Valencia166/2020
Gisela Barrera Badillo et al	1	unknown	unknown	unknown	Mexico/Queretaro-InDRE_04/2020
Guiomar et al et al	39	unknown	unknown	unknown	Portugal/PT0063/2020,Portugal/PT0040/2020,Portugal/PT0043/2020,Portugal/PT0036/2020,Portugal/PT0024/2020,Portugal/PT0067/2020,Portugal/PT0089/2020,Portugal/PT0057/2020,Portugal/PT0019/2020,Portugal/PT0028/2020,Portugal/PT0016/2020,Portugal/PT0051/2020,Portugal/PT0001b/2020,Portugal/PT0026/2020,Portugal/PT0031/2020,Portugal/PT0061/2020,Portugal/PT0023/2020,Portugal/PT0085/2020,Portugal/PT0066/2020…
McHugh et al	43	unknown	unknown	unknown	Scotland/EDB591/2020,Scotland/EDB1172/2020,Scotland/EDB202/2020,Scotland/EDB1079/2020,Scotland/EDB074/2020,Scotland/EDB045/2020,Scotland/EDB086/2020,Scotland/EDB106/2020,Scotland/EDB052/2020,Scotland/EDB013/2020,Scotland/EDB868/2020,Scotland/EDB1550/2020,Scotland/EDB197/2020,Scotland/EDB1700/2020,Scotland/EDB2089/2020,Scotland/EDB1697/2020,Scotland/EDB1469/2020,Scotland/EDB1544/2020,Scotland/EDB1…
Adams et al	51	unknown	unknown	unknown	Germany/NRW-39/2020,Germany/NRW-50/2020,Germany/NRW-10/2020,Germany/NRW-09/2020,Germany/NRW-04/2020,Germany/NRW-07/2020,Germany/NRW-08/2020,Germany/NRW-01/2020,Germany/NRW-05/2020,Germany/NRW-03/2020,Germany/NRW-02-1/2020,Germany/NRW-06/2020,Germany/NRW-14/2020,Germany/NRW-17/2020,Germany/NRW-15/2020,Germany/NRW-46/2020,Germany/NRW-35/2020,Germany/NRW-48/2020,Germany/NRW-55/2020,Germany/NRW-45/20…
Irma Lopez Martinez et al	1	unknown	unknown	unknown	Mexico/EdoMex-InDRE_03/2020
Marcela Mercado-Reyes et al	2	unknown	unknown	unknown	Colombia/Antioquia79256/2020,Colombia/Bogota78390/2020
Salazar et al	9	unknown	unknown	unknown	Uruguay/UY-5/2020,Uruguay/UY-6/2020,Uruguay/UY-1/2020,Uruguay/UY-2/2020,Uruguay/UY-4/2020,Uruguay/UY-9/2020,Uruguay/UY-6-2/2020,Uruguay/UY-8/2020,Uruguay/UY-10/2020
Sheng et al	2	unknown	unknown	unknown	Chongqing/YC01/2020,Chongqing/ZX01/2020
Wei et al	2	unknown	unknown	unknown	Fujian/8/2020,Fujian/13/2020
Butler et al	7	unknown	unknown	unknown	USA/NY-WCMP4A02N/2020,USA/NY-WCMP10G06P/2020,USA/NY-WCMP10C09P/2020,USA/NY-WCMP10H04P/2020,USA/NY-WCMP11F07P/2020,USA/NY-WCMP10H01P/2020,USA/NY-WCMP10C03P/2020
Harrigan et al	44	unknown	unknown	unknown	Canada/BC_83163/2020,Canada/BC_83109/2020,Canada/BC_4122951/2020,Canada/BC_8896915/2020,Canada/BC_7277381/2020,Canada/BC_8894200/2020,Canada/BC_3968175/2020,Canada/BC_4118226/2020,Canada/BC_8718874/2020,Canada/BC_8897642/2020,Canada/BC_8150537/2020,Canada/BC_0443574/2020,Canada/BC_3842755/2020,Canada/BC_6981299/2020,Canada/BC_0554880/2020,Canada/BC_1318414/2020,Canada/BC_3808524/2020,Canada/BC_39…
Chu et al et al	38	unknown	unknown	unknown	USA/WA-S257/2020,USA/WA-S147/2020,USA/WA-S320/2020,USA/WA-S243/2020,USA/WA-S309/2020,USA/WA-S484/2020,USA/WA-S272/2020,USA/WA-S140/2020,USA/WA-S2/2020,USA/WA-S281/2020,USA/WA-S123/2020,USA/WA-S6/2020,USA/WA-S10/2020,USA/WA-S236/2020,USA/WA-S234/2020,USA/WA-S3/2020,USA/WA-S317/2020,USA/WA-S345/2020,USA/WA-S466/2020,USA/WA-S156/2020,USA/WA-S310/2020,USA/WA-S308/2020,USA/WA-S493/2020,USA/WA-S330/202…
Chu etl al et al	30	unknown	unknown	unknown	USA/WA-S60/2020,USA/WA-S94/2020,USA/WA-S113/2020,USA/WA-S119/2020,USA/WA-S81/2020,USA/WA-S47/2020,USA/WA-S48/2020,USA/WA-S97/2020,USA/WA-S95/2020,USA/WA-S30/2020,USA/WA-S96/2020,USA/WA-S106/2020,USA/WA-S107/2020,USA/WA-S90/2020,USA/WA-S102/2020,USA/WA-S99/2020,USA/WA-S40/2020,USA/WA-S105/2020,USA/WA-S84/2020,USA/WA-S43/2020,USA/WA-S46/2020,USA/WA-S98/2020,USA/WA-S100/2020,USA/WA-S93/2020,USA/WA-S…
Majer et al	21	unknown	unknown	unknown	Canada/MB_38/2020,Canada/NL_34/2020,Canada/MB_8/2020,Canada/NS_32/2020,Canada/MB_2/2020,Canada/SK_63/2020,Canada/MB_10/2020,Canada/SK_16/2020,Canada/SK_20/2020,Canada/NB_1/2020,Canada/NB_6/2020,Canada/NB_21/2020,Canada/NB_35/2020,Canada/SK_52/2020,Canada/MB_36/2020,Canada/MB_39/2020,Canada/MB_37/2020,Canada/SK_4/2020,Canada/NS_13/2020,Canada/NS_31/2020,Canada/NS_30/2020
Chu et al	1	unknown	unknown	unknown	USA/WA2/2020
CZB Cliahub Consortium et al	47	unknown	unknown	unknown	USA/CA-CZB0151/2020,USA/CA-CZB011b/2020,USA/CA-CZB076/2020,USA/CA-CZB0154/2020,USA/CA-CZB0108/2020,USA/CA-CZB0746/2020,USA/CA-CZB04/2020,USA/CA-CZB0700/2020,USA/CA-CZB0726/2020,USA/CA-CZB0109/2020,USA/CA-CZB-1043/2020,USA/CA-CZB-1080/2020,USA/CA-CZB-1064/2020,USA/CA-CZB-1047/2020,USA/CA-CZB-1060/2020,USA/CA-CZB-1077/2020,USA/CA-CZB-1076/2020,USA/CA-CZB088/2020,USA/CA-CZB-1067/2020,USA/CA-CZB-1053…
Brendan O'Connell et al	16	unknown	unknown	unknown	USA/OR-OHSU051-CV51/2020,USA/OR-OHSU023-CV23/2020,USA/OR-OHSU012-CV12/2020,USA/OR-OHSU050-CV50/2020,USA/OR-OHSU048-CV48/2020,USA/OR-OHSU05-CV5/2020,USA/OR-OHSU052-CV52/2020,USA/OR-OHSU053-CV53/2020,USA/OR-OHSU054-CV54/2020,USA/OR-OHSU047-CV47/2020,USA/OR-OHSU010-CV10/2020,USA/OR-OHSU08-CV8/2020,USA/OR-OHSU022-CV22/2020,USA/OR-OHSU043-CV43/2020,USA/OR-OHSU027-CV27/2020,USA/OR-OHSU045-CV45/2020
Sikazwe et al	9	unknown	unknown	unknown	Australia/WA04/2020,Australia/WA09/2020,Australia/WA10/2020,Australia/WA07/2020,Australia/WA11/202,Australia/WA01/2020,Australia/WA06/2020,Australia/WA02/2020,Australia/WA03/2020
Domman et al	13	unknown	unknown	unknown	USA/WY-WYPHL001/2020,USA/WY-WYPHL012/2020,USA/WY-WYPHL011/2020,USA/WY-WYPHL018/2020,USA/WY-WYPHL014/2020,USA/WY-WYPHL010/2020,USA/WY-WYPHL015/2020,USA/WY-WYPHL005/2020,USA/WY-WYPHL008/2020,USA/WY-WYPHL004/2020,USA/WY-WYPHL007/2020,USA/WY-WYPHL019/2020,USA/WY-WYPHL006/2020
Eshaghi et al	44	unknown	unknown	unknown	Canada/ON_PHL1083/2020,Canada/ON_PHL5710/2020,Canada/ON_PHL0178/2020,Canada/ON_PHL4464/2020,Canada/ON_PHL3802/2020,Canada/ON_PHL6883/2020,Canada/ON_PHL8580/2020,Canada/ON_PHL0052/2020,Canada/ON_PHL0142/2020,Canada/ON_PHL5694/2020,Canada/ON_PHL7512/2020,Canada/ON_PHL5472/2020,Canada/ON_PHL3318/2020,Canada/ON_PHL3917/2020,Canada/ON_PHL3459/2020,Canada/ON_PHL0141/2020,Canada/ON_PHL4181/2020,Canada/O…
Gudbjartsson et al	41	unknown	unknown	unknown	Iceland/405/2020,Iceland/479/2020,Iceland/415/2020,Iceland/298/2020,Iceland/447/2020,Iceland/13/2020,Iceland/120/2020,Iceland/537/2020,Iceland/540/2020,Iceland/446/2020,Iceland/292/2020,Iceland/281/2020,Iceland/128/2020,Iceland/426/2020,Iceland/451/2020,Iceland/306/2020,Iceland/258/2020,Iceland/104/2020,Iceland/11/2020,Iceland/72/2020,Iceland/97/2020,Iceland/129/2020,Iceland/144/2020,Iceland/218/…
Duarte et al	6	unknown	unknown	unknown	CostaRica/03/2020,CostaRica/01/2020,CostaRica/02/2020,CostaRica/05/2020,CostaRica/06/2020,CostaRica/04/2020
Santiago et al	13	unknown	unknown	unknown	PuertoRico/CDC-S7/2020,PuertoRico/CDC-S1/2020,PuertoRico/CDC-S3/2020,PuertoRico/CDC-S6/2020,PuertoRico/CDC-S4/2020,PuertoRico/CDC-S18/2020,PuertoRico/CDC-S19/2020,PuertoRico/CDC-S2/2020,PuertoRico/CDC-S8/2020,PuertoRico/CDC-S9/2020,PuertoRico/CDC-S10/2020,PuertoRico/CDC-S11/2020,PuertoRico/CDC-S5/2020
Joel Armando Vazquez Perez et al	4	unknown	unknown	unknown	Mexico/CDMX-INER_05/2020,Mexico/CDMX-INER_02/2020,Mexico/CDMX-INER_01/2020,Mexico/CDMX-INER_04/2020
Adnan Araiza Rodriguez et al	1	unknown	unknown	unknown	Mexico/CDMX-InDRE_06/2020
Young et al	79	unknown	unknown	unknown	USA/UT-0107/2020,USA/UT-0108/2020,USA/UT-01222/2020,USA/UT-055/2020,USA/UT-014/2020,USA/UT-012/2020,USA/UT-010/2020,USA/UT-099/2020,USA/UT-0159/2020,USA/UT-083/2020,USA/UT-01218/2020,USA/UT-0541/2020,USA/UT-0511/2020,USA/UT-0531/2020,USA/UT-02222/2020,USA/UT-02223/2020,USA/UT-02235/2020,USA/UT-02247/2020,USA/UT-0539/2020,USA/UT-02244/2020,USA/UT-023/2020,USA/UT-0513/2020,USA/UT-0514/2020,USA/UT-0…
Perng et al	23	unknown	unknown	unknown	Taiwan/TSGH-16/2020,Taiwan/TSGH-09/2020,Taiwan/TSGH-20/2020,Taiwan/TSGH-13/2020,Taiwan/TSGH-02/2020,Taiwan/TSGH-11/2020,Taiwan/TSGH-01/2020,Taiwan/TSGH-06/2020,Taiwan/TSGH-17/2020,Taiwan/TSGH-10/2020,Taiwan/TSGH-19/2020,Taiwan/TSGH-03/2020,Taiwan/TSGH-05/2020,Taiwan/TSGH-12/2020,Taiwan/TSGH-24/2020,Taiwan/TSGH-21/2020,Taiwan/TSGH-07/2020,Taiwan/TSGH-18/2020,Taiwan/TSGH-14/2020,Taiwan/TSGH-04/2020…
Nemudryi et al	2	unknown	unknown	unknown	USA/MT-BHDH-074/2020,env/USA/MT-BWRF-0327/2020
Lam et al	4	unknown	unknown	unknown	Australia/NSW94/2020,Australia/NSW84/2020,Australia/NSW164/2020,Australia/NSW124/2020
DCLS et al	1	unknown	unknown	unknown	USA/VA-DCLS-01/2020
Maria Aguero-Rosenfeld et al	61	unknown	unknown	unknown	USA/NJ-NYUMC111/2020,USA/NY-NYUMC249/2020,USA/NY-NYUMC383/2020,USA/NJ-NYUMC344/2020,USA/NY-NYUMC126/2020,USA/NY-NYUMC292/2020,USA/CT-NYUMC374/2020,USA/NY-NYUMC253/2020,USA/NY-NYUMC192/2020,USA/NJ-NYUMC106/2020,USA/NY-NYUMC76/2020,USA/NJ-NYUMC329/2020,USA/NY-NYUMC445/2020,USA/NY-NYUMC214/2020,USA/NJ-NYUMC367/2020,USA/NY-NYUMC435/2020,USA/NJ-NYUMC401/2020,USA/NY-NYUMC390/2020,USA/NY-NYUMC246/2020,U…
Timms et al	5	unknown	unknown	unknown	Australia/NSW96/2020,Australia/NSW219/202,Australia/NSW13/2020,Australia/NSW50/2020,Australia/NSW156/2020
Virginia DCLS et al	1	unknown	unknown	unknown	USA/VA-DCLS-02/2020
Virginia Division of Consolidated Laboratories et al	1	unknown	unknown	unknown	USA/VA-DCLS-03/2020
Zhang et al	6	unknown	unknown	unknown	USA/WA-NH2/2020,Wuhan-Hu-1/2019,USA/WI1/2020,Zhejiang/WZ-02/2020,USA/CA6/2020,Zhejiang/HZ103/2020
UNMC COVID-19 Response Team et al	5	unknown	unknown	unknown	USA/NE-886/2020,USA/NE-892/2020,USA/NE-912/2020,USA/NE-875/2020,USA/NE-907/2020
Shi et al	2	unknown	unknown	unknown	China/IQTC01/2020,China/IQTC02/2020
Radhakrishna et al	1	unknown	unknown	unknown	India/GMC-RK100/2020
Johar et al	7	unknown	unknown	unknown	Indonesia/JKT-EIJK0141/2020,Indonesia/JKT-EIJK04/2020,Indonesia/JKT-EIJK01/2020,Indonesia/JKT-EIJK0317/2020,Indonesia/JKT-EIJK02/2020,Indonesia/JKT-EIJK03/2020,Indonesia/JKT-EIJK2444/2020
Shimizu et al	1	unknown	unknown	unknown	Indonesia/EJ-ITD853Sp/2020
Bal et al	41	unknown	unknown	unknown	France/Lyon_06573/2020,France/RA739/2020,France/ARA11036/2020,France/ARA12217/2020,France/Clermont-Ferrand_650/2020,France/Lyon_06042/2020,France/Lyon_06625/2020,France/ARA12264/2020,France/ARA12265/2020,France/Lyon_06531/2020,France/ARA12250/2020,France/ARA10189/2020,France/Bourg-en-Bresse_06678/2020,France/ARA10172/2020,France/ARA10165/2020,France/Lyon_487/2020,France/ARA12485/2020,France/ARA12…
Bengner et al	1	unknown	unknown	unknown	Sweden/01/2020
Kenneth Siu-Sing LEUNG et al	38	unknown	unknown	unknown	HongKong/HKPU53-0802/2020,HongKong/HKPU48-0202/2020,HongKong/HKPU12_2201/2020,HongKong/HKPU28_3001/2020,HongKong/HKPU49-3001/2020,HongKong/HKPU19_0402/2020,HongKong/HKPU102_2802/2020,HongKong/HKPU76-0802/2020,HongKong/HKPU86-1802/2020,HongKong/HKPU34_3001/2020,HongKong/HKPU90-1602/2020,HongKong/HKPU45-0502/2020,HongKong/HKPU70-1302/2020,HongKong/HKPU65-1202/2020,HongKong/HKPU92-1302/2020,HongKong…
Octavia et al	5	unknown	unknown	unknown	Singapore/7/2020,Singapore/8/2020,Singapore/10/2020,Singapore/9/2020,Singapore/11/2020
Terrier et al	1	unknown	unknown	unknown	France/IDF0386-islP1/2020
Thomas S.H. Chung et al	1	unknown	unknown	unknown	canine/HongKong/20-02756/2020
Chong-Yee YAU et al	1	unknown	unknown	unknown	HongKong/HKPU35_0402/2020
Linlin et al	1	unknown	unknown	unknown	China/WH-09/2020
Joan Marti-Carreras et al	139	unknown	unknown	unknown	Belgium/BJ-0324192/2020,Belgium/MJP-0306100/2020,Belgium/MSE-0324121/2020,Belgium/AC-030982/2020,Belgium/SJ-030583/2020,Belgium/DV-0324117/2020,Belgium/VRJM-0323114/2020,Belgium/VHV-0324118/2020,Belgium/SR-0319112/2020,Belgium/DME-0324135/2020,Belgium/MNL-0324130/2020,Belgium/DVG-0325146/2020,Belgium/JJC-0325165/2020,Belgium/BJ-0325181/2020,Belgium/DMM-0325180/2020,Belgium/DA-030691/2020,Belgium/…
Durkin et al	73	unknown	unknown	unknown	Belgium/ULG-10032/2020,Belgium/ULG-6688/2020,Belgium/ULG-10052/2020,Belgium/ULG-6743/2020,Belgium/ULG-10096/2020,Belgium/ULG-10088/2020,Belgium/ULG-10089/2020,Belgium/ULG-10080/2020,Belgium/ULG-10068/2020,Belgium/ULG-10043/2020,Belgium/ULG-10105/2020,Belgium/ULG-10044/2020,Belgium/ULG-10027/2020,Belgium/ULG-10131/2020,Belgium/ULG-10025/2020,Belgium/ULG-10109/2020,Belgium/ULG-10114/2020,Belgium/UL…
Milewska et al	1	unknown	unknown	unknown	Poland/PL_P1/2020
Popa et al	21	unknown	unknown	unknown	Austria/CeMM0009/2020,Austria/CeMM0001/2020,Austria/CeMM0002/2020,Austria/CeMM0004/2020,Austria/CeMM0005/2020,Austria/CeMM0011/2020,Austria/CeMM0006/2020,Austria/CeMM0016/2020,Austria/CeMM0008/2020,Austria/CeMM0020/2020,Austria/CeMM0003/2020,Austria/CeMM0010/2020,Austria/CeMM0019/2020,Austria/CeMM0018/2020,Austria/CeMM0014/2020,Austria/CeMM0015/2020,Austria/CeMM0012/2020,Austria/CeMM0013/2020,Aus…
Muenchhoff et al	92	unknown	unknown	unknown	Germany/BAV-MVP0070/2020,Germany/BAV-V2011463/2020,Germany/BAV-MVP0080/2020,Germany/BAV-MVP0081/2020,Germany/BAV-MVP0079/2020,Germany/BAV-MVP0001/2020,Germany/BAV-MVP0055/2020,Germany/BAV-V2011395/2020,Germany/BAV-MVP0044/2020,Germany/BAV-MVP0025/2020,Germany/BAV-MVP0016/2020,Germany/BAV-MVP0072/2020,Germany/BAV-MVP0090/2020,Germany/BAV-MVP0089/2020,Germany/BAV-MVP0026/2020,Germany/BAV-MVP0088/20…
Urban et al	32	unknown	unknown	unknown	Hungary/SRC-00620/2020,Hungary/SRC-1788lc/2020,Hungary/mbl2/2020,Hungary/MBL-002/2020,Hungary/mbl1/2020,Hungary/MBL-464/2020,Hungary/SRC-00066/2020,Hungary/MBL-469/2020,Hungary/MBL-465/2020,Hungary/SRC-00417/2020,Hungary/SRC-00541/2020,Hungary/SRC-00055/2020,Hungary/SRC-00126/2020,Hungary/SRC-00186/2020,Hungary/SRC-00817/2020,Hungary/SRC-00175/2020,Hungary/mbl49/2020,Hungary/SRC-00777/2020,Hungar…
Silamikelis et al	17	unknown	unknown	unknown	Latvia/04/2020,Latvia/02/2020,Latvia/03/2020,Latvia/014/2020,Latvia/013/2020,Latvia/012/2020,Latvia/017/2020,Latvia/015/2020,Latvia/06/2020,Latvia/07/2020,Latvia/011/2020,Latvia/09/2020,Latvia/010/2020,Latvia/01/2020,Latvia/08/2020,Latvia/05/2020,Latvia/016/2020
Smura et al	40	unknown	unknown	unknown	Finland/14M74/2020,Finland/13M79/2020,Finland/1/2020,Finland/14M82/2020,Finland/FIN01032020/2020,Finland/FIN-274/2020,Finland/FIN03032020B/2020,Finland/14M20/2020,Finland/FIN-114/2020,Finland/14M13/2020,Finland/13M19/2020,Finland/14M14/2020,Finland/14M77/2020,Finland/13M57/2020,Finland/13M77/2020,Finland/13M3/2020,Finland/FIN-318/2020,Finland/FIN03032020C/2020,Finland/FIN-313/2020,Finland/FIN-508…
Kotz et al	19	unknown	unknown	unknown	Sweden/20-08144/2020,Sweden/20-08142/2020,Sweden/20-08154/2020,Sweden/20-08149/2020,Sweden/20-08173/2020,Sweden/20-08171/2020,Sweden/20-08155/2020,Sweden/20-08143/2020,Sweden/20-08145/2020,Sweden/20-08148/2020,Sweden/20-08169/2020,Sweden/20-08170/2020,Sweden/20-08167/2020,Sweden/20-08172/2020,Sweden/20-08150/2020,Sweden/20-08151/2020,Sweden/20-08147/2020,Sweden/20-08152/2020,Sweden/20-08146/2020
Kirkegaard et al	59	unknown	unknown	unknown	Denmark/ALAB-SSI264/2020,DK/ALAB-SSI-1406/2020,Denmark/ALAB-SSI461/2020,Denmark/ALAB-SSI-691/2020,Denmark/ALAB-SSI103/2020,Denmark/ALAB-HH84/2020,Denmark/ALAB-SSI-607/2020,Denmark/ALAB-SSI420/2020,Denmark/ALAB-SSI365/2020,Denmark/ALAB-SSI276/2020,DK/ALAB-SSI-941/2020,DK/ALAB-SSI-786/2020,DK/ALAB-SSI-1086/2020,Denmark/ALAB-SSI410A/2020,Denmark/ALAB-SSI430/2020,Denmark/ALAB-SSI-690/2020,DK/ALAB-SSI…
Claudio Tavares Sacchi et al	12	unknown	unknown	unknown	Brazil/SPBR-11/2020,Brazil/SPBR-10/2020,Brazil/SPBR-12/2020,Brazil/SPBR-14/2020,Brazil/SPBR-13/2020,Brazil/SPBR-08/2020,Brazil/SPBR-04/2020,Brazil/SPBR-03/2020,Brazil/SPBR-07/2020,Brazil/SPBR-05/2020,Brazil/SPBR-09/2020,Brazil/SPBR-06/2020
Alan K.L. Tsang et al	1	unknown	unknown	unknown	HongKong/VB20017970/2020
FOI Bioinformatics team et al	2	unknown	unknown	unknown	Sweden/RV-FOI-1/2020,Sweden/RV-FOI-6/2020
Sah et al	1	unknown	unknown	unknown	Nepal/61/2020
Cui et al	1	unknown	unknown	unknown	Jiangsu/JS01/2020
Hua et al	1	unknown	unknown	unknown	Hangzhou/HZ-1/2020
Suppiah.J et al	6	unknown	unknown	unknown	Malaysia/IMR_WC085/2020,Malaysia/IMR_WC1177/2020,Malaysia/IMR_WC627/2020,Malaysia/IMR_WC1098/2020,Malaysia/IMR_WC1097/2020,Malaysia/IMR_WC1170/2020
Zhao et al	2	unknown	unknown	unknown	Jiangsu/JS02/2020,Jiangsu/JS03/2020
Yu hua et al	15	unknown	unknown	unknown	Hangzhou/HZ79/2020,Hangzhou/HZ91/2020,Hangzhou/HZ638/2020,Hangzhou/HZ481/2020,Hangzhou/HZ551/2020,Hangzhou/HZ576/2020,Hangzhou/HZ90/2020,Hangzhou/HZ48/2020,Hangzhou/HZ49/2020,Hangzhou/HZ477/2020,Hangzhou/HZ60/2020,Hangzhou/HZ62/2020,Hangzhou/HZ162/2020,Hangzhou/HZ185/2020,Hangzhou/HZ178/2020
Tsao et al	20	unknown	unknown	unknown	Taiwan/CGMH-CGU-01/2020,Taiwan/CGMH-CGU-02/2020,Taiwan/CGMH-CGU-04/2020,Taiwan/CGMH-CGU-05/2020,Taiwan/CGMH-CGU-07/2020,Taiwan/CGMH-CGU-03/2020,Taiwan/CGMH-CGU-08/2020,Taiwan/CGMH-CGU-06/2020,Taiwan/CGMH-CGU-10/2020,Taiwan/CGMH-CGU-11/2020,Taiwan/CGMH-CGU-09/2020,Taiwan/CGMH-CGU-15/2020,Taiwan/CGMH-CGU-13/2020,Taiwan/CGMH-CGU-12/2020,Taiwan/CGMH-CGU-20/2020,Taiwan/CGMH-CGU-18/2020,Taiwan/CGMH-CGU…
Clark et al	12	unknown	unknown	unknown	England/NOTT-10E793/2020,England/NOTT-10EDCE/2020,England/NOTT-10F228/2020,England/NOTT-10F510/2020,England/NOTT-10FB69/2020,England/NOTT-10DF23/2020,England/NOTT-10FB78/2020,England/NOTT-10FA4E/2020,England/NOTT-10DF05/2020,England/NOTT-10FB87/2020,England/NOTT-10E1C2/2020,England/NOTT-10FCC0/2020
Hishiki et al	4	unknown	unknown	unknown	Japan/Hu_Kng_19-437/2020,Japan/Hu_DP_Kng_19-027/2020,Japan/Hu_DP_Kng_19-020/2020,Japan/Hu_DP_Kng_19-031/2020
Marquez et al	1	unknown	unknown	unknown	Ecuador/HEE-01/2020
M.E. Quinones-Mateu et al	2	unknown	unknown	unknown	NewZealand/CoV001/2020,NewZealand/CoV002/2020
Slavikova et al	4	unknown	unknown	unknown	Slovakia/SK-BMC6/2020,Slovakia/SK-BMC1/2020,Slovakia/SK-BMC5/2020,Slovakia/SK-BMC2/2020
Lambrechts et al	19	unknown	unknown	unknown	Belgium/UGent-11/2020,Belgium/UGent-17/2020,Belgium/UGent-15/2020,Belgium/UGent-1/2020,Belgium/UGent-18/2020,Belgium/UGent-31/2020,Belgium/UGent-2/2020,Belgium/UGent-37/2020,Belgium/UGent-6/2020,Belgium/UGent-28/2020,Belgium/UGent-30/2020,Belgium/UGent-35/2020,Belgium/UGent-32/2020,Belgium/UGent-25/2020,Belgium/UGent-22/2020,Belgium/UGent-34/2020,Belgium/UGent-24/2020,Belgium/UGent-36/2020,Belgiu…
Cao et al	1	unknown	unknown	unknown	Vietnam/19-01S/2020
Nguyen et al	1	unknown	unknown	unknown	Vietnam/19-02S/2020
Ge et al	1	unknown	unknown	unknown	Fuyang/FY002/2020
Karlsson et al	2	unknown	unknown	unknown	Cambodia/0012/2020,Sweden/20-07389/2020
Sun et al	1	unknown	unknown	unknown	Yunnan/0306-466/2020
Dempsey et al	1	unknown	unknown	unknown	Ireland/Cork2/2020
Allam et al	2	unknown	unknown	unknown	SouthAfrica/R02827/2020,SouthAfrica/R03006/2020
Sundqvist et al	26	unknown	unknown	unknown	Sweden/20-50125/2020,Sweden/20-50132/2020,Sweden/20-50234/2020,Sweden/20-50087/2020,Sweden/20-50312/2020,Sweden/20-50129/2020,Sweden/20-50235/2020,Sweden/20-50123/2020,Sweden/20-50048/2020,Sweden/20-50171/2020,Sweden/20-50131/2020,Sweden/20-50130/2020,Sweden/20-50043/2020,Sweden/20-50170/2020,Sweden/20-50180/2020,Sweden/20-50133/2020,Sweden/20-50176/2020,Sweden/20-50175/2020,Sweden/20-50173/2020,…
Djillali et al	1	unknown	unknown	unknown	France/CIBU-200634/2020
Kathrine Stene-Johansen et al	28	unknown	unknown	unknown	Norway/2087/2020,Norway/1380/2020,Norway/1538/2020,Norway/1494/2020,Norway/1455/2020,Norway/1443/2020,Norway/1493/2020,Norway/1694/2020,Norway/1379/2020,Norway/2052/2020,Norway/1526/2020,Norway/2088/2020,Norway/1867/2020,Norway/2093/2020,Norway/2090/2020,Norway/1811/2020,Norway/1772/2020,Norway/1495/2020,Norway/1953/2020,Norway/1955/2020,Norway/1781/2020,Norway/2065/2020,Norway/2114/2020,Norway/2…
Meredith et al	24	unknown	unknown	unknown	England/CAMB-782EF/2020,England/CAMB-78865/2020,England/CAMB-754CE/2020,England/CAMB-75622/2020,England/CAMB-7C12A/2020,England/CAMB-78601/2020,England/CAMB-7AFAA/2020,England/CAMB-7B06A/2020,England/CAMB-7E1BF/2020,England/CAMB-7C263/2020,England/CAMB-7AAB8/2020,England/CAMB-787A4/2020,England/CAMB-78847/2020,England/CAMB-78ABA/2020,England/CAMB-7B2BF/2020,England/CAMB-7C272/2020,England/CAMB-7C…
Javed et al	1	unknown	unknown	unknown	Pakistan/Gilgit1/2020
Jeewandara et al	4	unknown	unknown	unknown	SriLanka/COV38/2020,SriLanka/COV486/2020,SriLanka/COV53/2020,SriLanka/COV91/2020
Yadav et al	17	unknown	unknown	unknown	India/1125/2020,India/1111/2020,India/1644/2020,India/1652/2020,India/1617/2020,India/1104/2020,India/1621/2020,India/1063/2020,India/1073/2020,India/1093/2020,India/1100/2020,India/1115/2020,India/1616/2020,India/c31/2020,India/1135/2020,India/3239/2020,India/3118/2020
Patel et al	2	unknown	unknown	unknown	USA/NY1-PV08001/2020,India/GBRC17a/2020
Walter et al	1	unknown	unknown	unknown	Germany/BavPat2/2020
Khosravi et al	1	unknown	unknown	unknown	Iran/HGRC-2-2162/2020
Zeinali et al	1	unknown	unknown	unknown	Iran/HGRC-01-IPI-8206/2020
Yun et al	1	unknown	unknown	unknown	Sweden/20-04631/2020
Fahd Al-Mulla et al	8	unknown	unknown	unknown	Kuwait/KU17/2020,Kuwait/KU18/2020,Kuwait/KU09/2020,Kuwait/KU12/2020,Kuwait/KU008/2020,Kuwait/KU006/2020,Kuwait/KU005/2020,Kuwait/KU001/2020
Shaikh Terkis Islam Pavel et al	1	unknown	unknown	unknown	Turkey/ERAGEM-001/2020
Seemann et al	8	unknown	unknown	unknown	Australia/VIC878/2020,Australia/VIC135/2020,Australia/VIC1178/2020,Australia/VIC801/2020,Australia/VIC802/2020,Australia/VIC1032/2020,Australia/VIC479/2020,Australia/VIC898/2020
Kotaria et al	5	unknown	unknown	unknown	Georgia/Tb-82/2020,Georgia/Tb-468/2020,Georgia/Tb-54/2020,Georgia/Tb-477/2020,Georgia/Tb-1352/2020
Inbar Cohen-Gihon et al	2	unknown	unknown	unknown	Israel/ISR_JP0320/2020,Israel/ISR_IT0320/2020
Giandhari et al	9	unknown	unknown	unknown	SouthAfrica/KRISP-06/2020,SouthAfrica/KRISP-02/2020,SouthAfrica/KRISP-012/2020,SouthAfrica/KRISP-045/2020,SouthAfrica/KRISP-04/2020,SouthAfrica/KRISP-051/2020,SouthAfrica/KRISP-07/2020,SouthAfrica/KRISP-011/2020,SouthAfrica/KRISP-010/2020
Medado et al	6	unknown	unknown	unknown	Philippines/RITM-06/2020,Philippines/RITM-04/2020,Philippines/RITM-03/2020,Philippines/RITM-02/2020,Philippines/RITM-05/2020,Philippines/RITM-07/2020
Lapid et al	6	unknown	unknown	unknown	Philippines/PGC03/2020,Philippines/PGC01/2020,Philippines/PGC02/2020,Philippines/PGC05/2020,Philippines/PGC04/2020,Philippines/PGC06/2020
Gall et al	1	unknown	unknown	unknown	Australia/NSW25/2020
Alghoribi et al	1	unknown	unknown	unknown	SaudiArabia/KAIMRC-Alghoribi/2020
Mak Tze Minn et al	27	unknown	unknown	unknown	Brunei/3/2020,Brunei/2/2020,Brunei/5/2020,Brunei/4/2020,Singapore/79/2020,Singapore/78/2020,Singapore/84/2020,Singapore/73/2020,Singapore/81/2020,Singapore/91/2020,Singapore/88/2020,Singapore/87/2020,Singapore/80/2020,Singapore/76/2020,Singapore/77/2020,Singapore/86/2020,Singapore/90/2020,Singapore/85/2020,Singapore/75/2020,Singapore/83/2020,Singapore/89/2020,Singapore/82/2020,Singapore/74/2020,S…
Sood et al	1	unknown	unknown	unknown	India/GBRC24a/2020
Shah et al	2	unknown	unknown	unknown	India/GBRC24b/2020,India/GBRC8/2020
Pattabiraman et al	16	unknown	unknown	unknown	India/nimh-0318/2020,India/nimh-0351/2020,India/nimh-2873/2020,India/nimh-1071/2020,India/nimh-0996/2020,India/nimh-1596/2020,India/nimh-1598/2020,India/nimh-0113/2020,India/nimh-0130/2020,India/nimh-0182/2020,India/nimh-0116/2020,India/nimh-0834/2020,India/nimh-3952/2020,India/nimh-4378/2020,India/nimh-3970/2020,India/nimh-4376/2020
Nagamani et al	2	unknown	unknown	unknown	India/GMC-KN443/2020,India/GMC-KN318/2020
Kinariwala et al	1	unknown	unknown	unknown	India/GBRC16/2020
Sesay et al et al	3	unknown	unknown	unknown	Gambia/GC19-026/2020,Gambia/GC19-015/2020,Gambia/GC19-029/2020
Mahnic et al	1	unknown	unknown	unknown	Slovenia/MB0329/2020
Yoong Min CHONG et al	2	unknown	unknown	unknown	Malaysia/189332/2020,Malaysia/188407/2020
Kanani et al	1	unknown	unknown	unknown	India/GBRC10/2020
Stefanelli et al	2	unknown	unknown	unknown	Italy/SPL1/2020,Italy/CDG1/2020
Capobianchi et al	1	unknown	unknown	unknown	Italy/INMI1-cs/2020
Machablishvili et al	1	unknown	unknown	unknown	Georgia/Tb-537/2020
Tomaz Mark Zorec et al	1	unknown	unknown	unknown	Slovenia/808/2020
Rabalski et al	1	unknown	unknown	unknown	Poland/Pom1/2020
Nguyen Thi Tam et al	11	unknown	unknown	unknown	Vietnam/OUCRU01097/2020,Vietnam/OUCRU0985/2020,Vietnam/OUCRU0762/2020,Vietnam/OUCRU0837/2020,Vietnam/OUCRU0418/2020,Vietnam/OUCRU0300/2020,Vietnam/OUCRU022/2020,Vietnam/OUCRU026/2020,Vietnam/OUCRU0419/2020,Vietnam/OUCRU0299/2020,Vietnam/OUCRU0764/2020
Schmutz et al	6	unknown	unknown	unknown	Switzerland/1000477102/2020,Switzerland/1000477757/2020,Switzerland/1000477377/2020,Switzerland/1000477797/2020,Switzerland/1000477806/2020,Switzerland/1000477796/2020
Thushan de Silva et al	10	unknown	unknown	unknown	England/SHEF-C6622/2020,England/SHEF-D2BD9/2020,England/SHEF-C5DD3/2020,England/SHEF-C001B/2020,England/SHEF-CCED9/2020,England/SHEF-C9B02/2020,England/SHEF-CEC55/2020,England/SHEF-C2222/2020,England/SHEF-CB3F9/2020,England/SHEF-C319D/2020
Dwyer et al	1	unknown	unknown	unknown	Australia/NSW41/2020
Carr et al	11	unknown	unknown	unknown	Ireland/22901/2020,Ireland/24042/2020,Ireland/Dublin-22361/2020,Ireland/21023/2020,Ireland/Dublin-19072/2020,Ireland/21145/2020,Ireland/Dublin-22428/2020,Ireland/24052/2020,Ireland/Limerick-19933/2020,Ireland/Limerick-19934/2020,Ireland/Limerick-19935/2020
Selhorst et al	21	unknown	unknown	unknown	Belgium/ITM_C585/2020,Belgium/ITM_C285/2020,Belgium/ITM_C233/2020,Belgium/ITM_C305/2020,Belgium/ITM_C451/2020,Belgium/ITM_C366/2020,Belgium/ITM_C189/2020,Belgium/ITM_C053/2020,Belgium/ITM_C420/2020,Belgium/ITM_C511/2020,Belgium/ITM_C262/2020,Belgium/ITM_C211/2020,Belgium/ITM_C340/2020,Belgium/ITM_C147/2020,Belgium/ITM_C159/2020,Belgium/ITM_C406/2020,Belgium/ITM_C447/2020,Belgium/ITM_C347/2020,Bel…
Costa et al	2	unknown	unknown	unknown	Portugal/IGC00009/2020,Portugal/IGC00010/2020
Jaqueline Goes de Jesus et al	2	unknown	unknown	unknown	Brazil/SPBR-02/2020,Brazil/SPBR-01/2020
Kashofer et al	13	unknown	unknown	unknown	Austria/Graz-MUG17/2020,Austria/Graz-MUG11/2020,Austria/Graz-MUG15/2020,Austria/Graz-MUG7/2020,Austria/Graz-MUG1/2020,Austria/Graz-MUG5/2020,Austria/Graz-MUG2/2020,Austria/Graz-MUG16/2020,Austria/Graz-MUG3/2020,Austria/Graz-MUG4/2020,Austria/Graz-MUG9/2020,Austria/Graz-MUG6/2020,Austria/Graz-MUG8/2020
Paden et al	1	unknown	unknown	unknown	USA/MA1/2020
Tyson et al	1	unknown	unknown	unknown	Canada/ON-VIDO-01/2020
Corman et al	2	unknown	unknown	unknown	Germany/BavPat1/2020,Germany/Baden-Wuerttemberg-1/2020
Adelino et al	23	unknown	unknown	unknown	Brazil/CV9/2020,Brazil/CV31/2020,Brazil/CV17/2020,Brazil/CV35/2020,Brazil/CV48/2020,Brazil/CV32/2020,Brazil/CV33/2020,Brazil/CV19/2020,Brazil/CV16/2020,Brazil/CV26/2020,Brazil/CV8/2020,Brazil/CV43/2020,Brazil/CV3/2020,Brazil/CV49/2020,Brazil/CV13/2020,Brazil/CV42/2020,Brazil/CV2/2020,Brazil/CV6/2020,Brazil/CV28/2020,Brazil/CV12/2020,Brazil/CV4/2020,Brazil/CV21/2020,Brazil/CV20/2020
Zehender et al	2	unknown	unknown	unknown	Italy/UniMI01/2020,Italy/UniMI03/2020
Branicki et al	8	unknown	unknown	unknown	Poland/PL_P9/2020,Poland/PL_P8/2020,Poland/PL_P5/2020,Poland/PL_P2/2020,Poland/PL_P3/2020,Poland/PL_P4/2020,Poland/PL_P6/2020,Poland/PL_P7/2020
Castilletti et al	1	unknown	unknown	unknown	Italy/INMI8/2020
Recio et al	1	unknown	unknown	unknown	Spain/Madrid_H12_32/2020
Komissarov et al	54	unknown	unknown	unknown	Russia/StPetersburg-RII6053S/2020,Russia/StPetersburg-RII4637S/2020,Russia/StPetersburg-RII4678S/2020,Russia/StPetersburg-RII4144S/2020,Russia/StPetersburg-RII4937S/2020,Russia/StPetersburg-RII5244S/2020,Russia/StPetersburg-RII4382V/2020,Russia/StPetersburg-RII5942S/2020,Russia/StPetersburg-RII6031S/2020,Russia/StPetersburg-RII4384V/2020,Russia/StPetersburg-RII4917S/2020,Russia/StPetersburg-RII43…
Fabiola Garces Ayala et al	1	unknown	unknown	unknown	Mexico/Puebla-InDRE_05/2020
Armengol et al	1	unknown	unknown	unknown	Spain/Irsi-04/2020
LAUBSCHER Florian et al. et al	8	unknown	unknown	unknown	Switzerland/GE3121/2020,Switzerland/GE5373/2020,Switzerland/VD5615/2020,Switzerland/GE3895/2020,Switzerland/GE9586/2020,Switzerland/BL0902/2020,Switzerland/TI9486/2020,Switzerland/AG0361/2020
Mendoza et al	1	unknown	unknown	unknown	Spain/Vircell001/2020
Andres et al	2	unknown	unknown	unknown	Spain/VH000001133/2020,Spain/VH198152683/2020
Jodar et al	26	unknown	unknown	unknown	Argentina/PAIS_A008/2020,Argentina/PAIS_A013/2020,Argentina/PAIS_A015/2020,Argentina/PAIS_A012/2020,Argentina/PAIS_A009/2020,Argentina/PAIS_A007/2020,Argentina/PAIS_A002/2020,Argentina/PAIS_A001/2020,Argentina/PAIS_A024/2020,Argentina/PAIS_A023/2020,Argentina/PAIS_A026/2020,Argentina/PAIS_A027/2020,Argentina/PAIS_A017/2020,Argentina/PAIS_A018/2020,Argentina/PAIS_A020/2020,Argentina/PAIS_A021/2020…
Mia Settergren Hammer et al	1	unknown	unknown	unknown	Sweden/20-06813/2020
No. 325 et al 1 unknown unknown unknown Taiwan/TSGH-15/2020 Laubscher et al 40 unknown unknown unknown Switzerland/GE2453/2020,Switzerland/GE0304/2020,Switzerland/GE0199/2020,Switzerland/GE8147/2020,Switzerland/TI2045/2020,Switzerland/VD0503/2020,Switzerland/GR2988/2020,Switzerland/GR3043/2020,Switzerland/GE8102/2020,Switzerland/GE1422/2020,Switzerland/GE1736/2020,Switzerland/GE1402/2020,Switzerl…
